## STATE-OF-THE-ART CLINICAL ARTICLE

**Invasive Aspergillosis****David W. Denning***From the Department of Infectious Diseases & Tropical Medicine, (Monsall Unit), University of Manchester, North Manchester General Hospital, Manchester, United Kingdom*

Since the first description of invasive aspergillosis as an opportunistic infection in 1953 [1], there has been a substantial increase in the number of cases documented at autopsy in all developed nations. The most recent figure from one major teaching hospital in Frankfurt, Germany, showed a 14-fold increase in the number of cases over the years 1978–1992; 4% of all patients autopsied were found to have invasive aspergillosis in the last year of this survey [2]. A national autopsy survey conducted in Japan from 1970 to 1995 showed that the incidence of invasive aspergillosis increased from 0.4% to 1.4% during that period [3]. The substantial worldwide use of fluconazole, which has no clinically useful activity against invasive aspergillosis, has not reduced the number of cases of this infection, which remains the most common invasive mold infection worldwide.

There has been a substantial increase in the number of patients at risk of developing invasive aspergillosis, for many reasons, including (1) the advent of AIDS; (2) the development of new intensive chemotherapy regimens for solid tumors, difficult-to-treat lymphoma, myeloma, and resistant leukemia; (3) a year-on-year worldwide increase in the number of solid organ transplant recipients, now numbering approximately .5 million annually; and (4) increased use of immunosuppressive regimens for other autoimmune diseases such as systemic lupus erythematosus. As other supportive care is improved and most bacterial infections are successfully treated, the importance of invasive aspergillosis has increased so that it is now a major direct or contributory cause of death at leukemia treatment centers and bone marrow transplantation and solid organ transplantation centers. This article reviews the current state of knowledge regarding invasive aspergillosis.

**History**

The first description of aspergillosis in animals was provided by Mayer in 1815 [4], who observed the infection in the air

sacs and lungs of a jackdaw (table 1). The first human case of aspergillosis was described in 1842 by Bennett in Edinburgh [6]. He described what he saw microscopically in the sputum of a patient with several aspergillomas in tuberculous cavities as a cryptogamic plant.

The same year, Rayer [7] described infection of the pleura by a mold, again not identified, and Gairdner [28] reported a similar case in 1853. Virchow [29] described four cases of bronchial and pulmonary aspergillosis in 1856. Other early descriptions are summarized by Rénon in 1897 [30], by Cawley in 1947 [19], and by Hinson et al. in 1952 [21]. Rénon recognized that some cases occurred following other diseases and that *Aspergillus* could invade the lung in addition to inhabiting tuberculous cavities or other cavities [30]. Many early cases (possibly only colonization) were described in pigeon-crammers or hair combers (for wigs). Cawley also remarked on the association between aspergillosis and certain occupations such as farmers, feed-mill workers, fur cleaners who used rye flour, threshers, and those in contact with silos or grains [19].

Other landmarks in the description of aspergillosis are shown in table 1. It is of interest that among deep, invasive forms of aspergillosis, only pulmonary and renal diseases were described in the nineteenth century. Likewise, superficial aspergillosis, including otomycosis and keratitis, was described as early as 1844. As with many early descriptions, details are often sketchy, but these early observations were of great importance in the initial recognition of the pathogenic potential of *Aspergillus*, especially in immunocompetent patients. Disseminated aspergillosis was described early in the twentieth century, but the histological appearances were almost always granulomatous, and the disease occurred in apparently immunocompetent patients. It was not until the introduction of corticosteroids and cytotoxic chemotherapy in the 1950s that the first cases of invasive pulmonary aspergillosis, the opportunistic infection we now clinically recognize, began to appear.

**Mycology**

The first attempt to define the genus *Aspergillus* was made by Micheli in 1729 [5]. He described, named, and illustrated the fungus beautifully in his most famous work, the *Nova Geneva Plantarum*, in 1729. He noted that the pattern of the conidial head of *Aspergillus*, with its spore heads radiating

---

Received 17 July 1997; revised 26 November 1997.

Reprints or correspondence: Dr. D. W. Denning, Department of Infectious Diseases & Tropical Medicine (Monsall Unit), North Manchester General Hospital, Delaunay's Road, Crumpsall, Manchester M8 6RB, United Kingdom.

**Clinical Infectious Diseases** 1998;26:781–805

© 1998 by The University of Chicago. All rights reserved.  
1058-4838/98/2604-0001\$03.00

**Table 1.** Landmark descriptions and reports of diseases caused by *Aspergillus* species.

| Reference | Year | Author(s)                          | Report                                                                                                   |
|-----------|------|------------------------------------|----------------------------------------------------------------------------------------------------------|
| [5]       | 1729 | Micheli                            | First description of <i>Aspergillus</i>                                                                  |
| [4]       | 1815 | Mayer                              | Air sac and pulmonary infection in a jackdaw                                                             |
| [6]       | 1842 | Bennett                            | Aspergilloma complicating tuberculosis with <i>Aspergillus</i> in sputum                                 |
| [7]       | 1842 | Rayer                              | Pleural aspergillosis                                                                                    |
| [8]       | 1844 | Mayer                              | Aspergillus otomycosis                                                                                   |
| [9]       | 1863 | Fresenius                          | Clear species description of <i>A. fumigatus</i> (isolated from air sacs and bronchi of a great bustard) |
| [10]      | 1879 | Leber                              | Aspergillus keratitis following chaff entering the eye                                                   |
| [11]      | 1886 | Boström                            | Cutaneous aspergillosis                                                                                  |
| [12]      | 1887 | Popoff                             | Allergic pulmonary disease caused by <i>Aspergillus</i>                                                  |
| [13]      | 1890 | Wheaton                            | Aspergillus tracheobronchitis                                                                            |
| [14]      | 1891 | Ross                               | Renal aspergillosis                                                                                      |
| [15]      | 1891 | Zarniko                            | Maxillary sinus aspergillosis                                                                            |
| [16]      | 1897 | Oppe                               | Sphenoid sinus aspergillosis                                                                             |
| [17]      | 1931 | Just                               | Cerebral aspergillosis                                                                                   |
| [18]      | 1936 | Shaw and Warthen                   | Aspergillosis of bone                                                                                    |
| [19]      | 1947 | Cawley                             | Invasive aspergillosis (probable) complicating chronic granulomatous disease (with meningitis)           |
| [20]      | 1950 | Zimmerman                          | Native valve aspergillus endocarditis                                                                    |
| [21]      | 1952 | Hinson, Moon, and Plummer          | Allergic bronchopulmonary aspergillosis, definition of disease                                           |
| [1]       | 1953 | Rankin                             | Invasive pulmonary aspergillosis as an opportunistic infection (during neutropenia)                      |
| [22]      | 1955 | Zimmerman                          | Invasive aspergillosis in infancy                                                                        |
| [23]      | 1959 | Finegold, Will, and Murray         | Classification of invasive aspergillosis                                                                 |
| [24]      | 1964 | Newman and Cordell                 | Postoperative aspergillus endocarditis                                                                   |
| [25]      | 1966 | Milosev et al.                     | Paranasal aspergillus granuloma in Sudan                                                                 |
| [26]      | 1970 | Young et al.                       | Comprehensive description of pathology of invasive aspergillosis, with clinical correlation              |
| [27]      | 1983 | Katzenstein, Sale, and Greenberger | Allergic aspergillus sinusitis                                                                           |

from a central structure, resembled an aspergillum (a brush or perforated globe used for sprinkling holy water); therefore, he named the genus *Aspergillus*. He described experiments of culturing fungi from spores both in gardens and on pieces of melon. His observations were ahead of his time, and their significance was overlooked until more than a century later. It was Link [31] who first named *A. flavus* in 1809 [31]. In 1926, Thom and Church [32] first classified the genus. They accepted 69 *Aspergillus* species in 11 groups. By 1945, Thom and Raper [33] had accepted 80 species.

By 1965 this classification was outdated, and Raper and Fennel [34] detailed 151 species in 18 different groups. By then, most species with a teleomorph had been identified. Additional work, led by Samson and Pitt, has further refined the species designations with use of new technologies such as DNA hybridization and thin-layer chromatography of secondary metabolites. Approximately 150 species are now accepted, and new species continue to be described [35].

Although *Aspergillus* is a separate genus, it is closely related to *Penicillium* species in the fungal kingdom. *Aspergillus* species are ascomycetes classified in the form subdivision Deuter-

omycotina because most of these molds do not have a sexual reproductive phase. The taxonomy of species within the *Aspergillus* genus is gradually undergoing revision with the use of molecular taxonomic methods and is not complete. The most common species of *Aspergillus* causing invasive disease include *A. fumigatus*, *A. flavus*, *A. niger*, *A. terreus*, and *A. nidulans*. A number of other rarer species rarely cause disease, including *A. amstelodami*, *A. avenaceus*, *A. caesiellus*, *A. candidus*, *A. carneus*, *A. chevalieri*, *A. clavatus*, *A. glaucus*, *A. granulatus*, *A. oryzae*, *A. quadrilineatus*, *A. restrictus*, *A. sydowi*, *A. ustus*, *A. versicolor*, *A. wentii*, *Neosartorya fisheri*, and others. *A. fumigatus* accounts for ~90% of cases of invasive aspergillosis.

Pathogenic *Aspergillus* species generally grow easily and relatively quickly on routine bacteriological and mycological media in the clinical laboratory. Certain species such as *A. glaucus* require high concentrations of glucose for optimum growth. Only pathogenic species are capable of growth at 35°–37°C, and *A. fumigatus* in particular is capable of growth at ≥50°C. Recent comparative work from a large retrospective series established that a higher yield was obtained by using

mycological media rather than standard bacteriological media in the clinical setting [36], and this procedure is recommended whenever a fungal infection, including aspergillosis, is considered diagnostically possible. Most isolates of *A. fumigatus* are capable of growth at oxygen tensions as low as 0.1% O<sub>2</sub> [37], and instances when isolates would grow only on anaerobic plates have been recorded. Additional work to optimize media for the growth of *Aspergillus* is warranted.

The organism grows initially as a small, fluffy white colony on the surface of agar. Spores usually develop within 36–48 hours of incubation at 30°–37°C for the major pathogenic species. For unusual species, it can take many more days, and sometimes weeks, for spores to appear, a circumstance that delays identification. Potato dextrose agar is particularly useful for inducing sporulation. Presumptive identification of *Aspergillus* at the genus level is relatively straightforward on the basis of microscopic criteria. The major pathogenic species have somewhat differently arranged spores on conidial heads in addition to different-colored colonies. Presently, formal identification may require cultures on specialized media such as Czapek-Dox and malt extract. In the future it is likely that molecular methods will be used to formally identify unusual species.

Until recently, it has not been therapeutically important to determine which species of *Aspergillus* is causing disease because no differences in outcome have been noted between infections caused by different species. Recently, however, some differences in susceptibility to itraconazole and other azoles have been noted between species (author's unpublished data; [38]). Thus, it may be more important now than previously to rapidly identify species or to test isolates for susceptibilities to make an optimal therapeutic decision.

## Pathogenesis

### Organism Factors

It takes ~5–12 hours for *A. fumigatus* to germinate at 37°C depending on the medium used [39]. Spores incubated in appropriate moisture conditions and temperature swell to approximately four-to-eight times their original volume. Their hydrophobic protein coat is replaced by another cell wall exterior. As hyphae appear, the logarithmic-phase growth begins. In vitro, hyphal extension and overall fungal mass increase logarithmically until ~24 hours, when the growth rate starts to plateau [39]. Branching of hyphae occurs early, and in shaking conditions in vitro, the organism takes on the appearance of multiple small balls. At the liquid-air interface in static culture, a mycelial mat is typically formed. These growth patterns probably reflect, in part, the branching characteristics of each isolate.

Most species of *Aspergillus* are incapable of growth at 37°C, a key characteristic that distinguishes pathogenic species from nonpathogenic species [40]. There are also discernible differences in the growth rate between different species of *Aspergil-*

*lus*; the most rapidly growing organism is *A. fumigatus*. Physiological and pharmacological concentrations of hydrocortisone accelerate the growth rate of *A. fumigatus* and *A. flavus* by 30%–40%. In vitro, in the presence of hydrocortisone, *A. fumigatus* has a doubling time of 48 minutes and a hyphal extension rate of 1–2 cm/h [39]. Growth rate is therefore likely to be one key determinant of the rate of progression of disease and, possibly, of pathogenicity.

In addition, *A. fumigatus* has some other characteristics that may contribute to its pathogenicity. These characteristics include very small spore size (3–5 μm), which enables the spores to penetrate deeply into the lung. Spores are capable of withstanding extraordinary atmospheric conditions, probably by virtue of the hydrophobic protein-coat layer, which may help protect them from host defenses [41–43]. Of all the pathogenic species, *A. fumigatus* in particular binds laminin [44] and fibrinogen [45] efficiently and somewhat better than other species of *Aspergillus*, presumably allowing greater adhesion in the airways before invasion.

Various putative virulence determinants have been described for *A. fumigatus*, including various proteases [46–48], ribotoxin [49–51], phospholipases [52], a hemolysin [53], gliotoxin [54–56], aflatoxin [57], phthioic acid [58], and other toxins [59, 60]. Extensive work with the alkaline protease of *A. fumigatus* with use of single or double deletants in carefully controlled animal model experiments has failed to show the importance of elastase (alkaline protease) in invasive aspergillosis [61]. However, one protease was able to induce pulmonary epithelial cell detachment as well as proinflammatory cytokine release [62]. Similarly, ribotoxin does not appear to be important in the pathogenesis of aspergillosis [51].

At least four different phospholipases are produced by *A. fumigatus* [52]. It is not yet known whether they contribute to the pathogenesis of invasive aspergillosis, but it is possible that they do. Species of *Clostridium* and *Pseudomonas* produce phospholipases, and these organisms' patterns of tissue destruction are similar to those of *A. fumigatus*. It is not yet known whether other species of *Aspergillus* produce phospholipase.

Gliotoxin has been shown to reduce macrophage and neutrophil phagocytosis [54]. Gliotoxin can also induce apoptosis [56], but whether gliotoxin contributes to pathogenesis has not yet been established. Phthioic acid is produced in small quantities by a very small number of *A. fumigatus* isolates and could conceivably contribute to granuloma formation, as it may do in tuberculosis, but it is unlikely to be a major virulence determinant.

*Aspergillus* produces a number of superoxide dismutases [63], at least two catalases [64–66] and mannitol [67–69]. These substances may protect the organism from damage due to singlet oxygen, hydrogen peroxide, hydroxyl radical, and other free radicals produced by phagocytes.

### Host Factors

*A. fumigatus* is an unusual pathogen in immunocompetent patients, although many cases of *A. fumigatus* infection in such

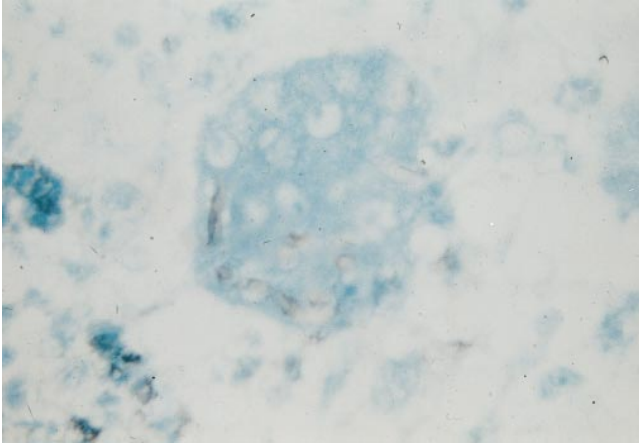

**Figure 1.** High-power view of a section of bone from a boy with chronic granulomatous disease who developed aspergillus osteomyelitis showing a multinucleated giant cell containing *Aspergillus* hyphae. (Courtesy of Dr. A. Jones, Hope Hospital, Manchester, UK; stain, Grocott-Gomori methenamine-silver; original magnification,  $\times 400$ .)

patients have been clearly documented. Thus, *A. fumigatus* is capable of being a primary pathogen in humans. It is notable that many animals, including dogs and horses and, in particular many birds, develop *Aspergillus* infections; this finding also indicates that *A. fumigatus* is occasionally a primary pathogen. Whether the presence of an undefined immune defect is necessary to allow *A. fumigatus* to cause infection is unknown.

The first immunologic line of defense against *Aspergillus* in the lungs, and presumably the nose, are macrophages, which are capable of ingesting and killing spores [70]. Both monocyte-derived and resident macrophages contribute to spore ingestion and killing. Hyphae are primarily killed by neutrophils [70, 71], with some contribution from monocytes [72] and possibly macrophages. Swollen spores and hyphae bind complement [73]. Hyphae are too large to be ingested, and therefore, killing proceeds extracellularly; this process is unlike killing of most bacteria and *Candida albicans*, in which the organisms are first internalized. As in patients with leprosy, the histological response in patients with aspergillosis ranges from a florid granulomatous response to few organisms (figure 1) to a minimal tissue response around extensive necrosis invaded by extensive networks of hyphae (figures 2A and B), depending to a great extent on the degree of immunologic deficit. Neutropenia and dysfunctional neutrophils (which occur in patients with AIDS [74] and chronic granulomatous disease [75]) are both important risk factors for invasive aspergillosis but lead to different pathology.

This relatively simple scheme is, of course, more complex than it first appears because of the influence of various cytokines, growth factors, and corticosteroids. Corticosteroids substantially impair macrophage killing of *Aspergillus* spores and neutrophil and mononuclear cell killing of *Aspergillus* hyphae [76, 77]. These negative effects are abrogated to some extent

by treatment with granulocyte colony-stimulating factor [76] and granulocyte-macrophage colony-stimulating factor (in vitro) [77]. Administration of IFN- $\gamma$  also improves monocyte and neutrophil function [76, 78]. Emerging data also indicate that T cell function may be important, particularly in the more chronic forms of invasive aspergillosis [79]. An interaction between neutrophil dysfunction and T helper cells via IL-4 has been observed in experimental models of invasive aspergillosis, and this interaction could have implications for human disease [79]. In patients with invasive disease, Th 2 cell responses predominate over Th 1 cell responses, and successful therapy could necessitate reversing these T helper cell responses. There is also evidence for acquired immunity, possibly mediated in part by macrophages [80].

## Epidemiology

### Environmental Location

In environmental terms, *A. fumigatus* is an ubiquitous organism that has been found in every region in the world, including Antarctica. It is believed that the primary ecological niche of *A. fumigatus* is decomposing vegetable material [81], and therefore rural areas, particularly farming locations, are a major source of this organism. There is a higher incidence of colonization with *A. fumigatus* among cystic fibrosis patients in rural locations [82] than among those in urban locations. *A. fumigatus* is particularly found in and around human habitation [83]—in cellars and potted plants and in pepper and spices [84]. In addition, unfiltered marijuana smoke may yield substantial quantities of *Aspergillus* spores and patients at risk for aspergillosis should be advised of this possibility.

Various molecular typing systems for *A. fumigatus* have been developed over the last 7 years [85]. These have proven to be robust and useful in evaluating the epidemiology of invasive aspergillosis. It is clear that there is widespread dispersal of genotypes of *A. fumigatus* around the world; for example, identical genotypes cause disease in the United States and Europe [86–89]. A complete population genetic analysis of the species has not yet been conducted, although the tools are now available to do so. The majority of infections are caused by a single genotype of *A. fumigatus*; occasionally, however, two or more genotypes have been identified in patients. The latter finding is particularly true for patients with aspergillomas. There does not appear to be a group of related genotypes that are more or less pathogenic [89], but such analyses have not been performed on large numbers of isolates from minimally immunocompetent patients, in whom prominent virulence determinants are most likely to be identified.

### Inoculum and Incubation Period

The development of invasive aspergillosis requires the exposure of a susceptible host to relevant inoculum. It is not known

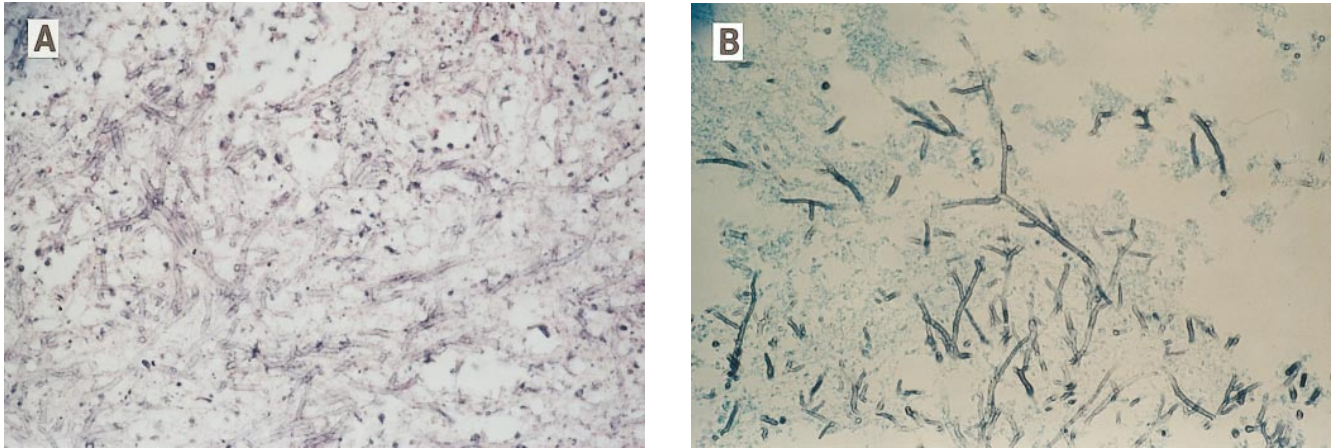

**Figure 2.** *A*, histological appearance under high power of an aspergillus brain abscess showing an inflammatory cell infiltrate surrounding *Aspergillus* hyphae. (Stain, hematoxylin-eosin; original magnification,  $\times 400$ .) *B*, Section of the same abscess showing the characteristic radiating pattern of *Aspergillus* hyphae with septae and branching at  $45^\circ$  angles. (Stain, methenamine silver; original magnification,  $\times 400$ .)

what the infectious inoculum for aspergillosis is, but this factor may depend upon the host.

It is also not clear what the incubation period between exposure to inoculum and the development of disease is. For one heart transplant recipient, it was documented that there was a 3-month time lag between the identification of *Aspergillus* in bronchoalveolar lavage fluid and the subsequent development of disseminated disease [90]. It is also notable that for neutropenic patients, invasive aspergillosis virtually never manifests before the 12th day of profound neutropenia [91], although many patients have sinus or airway colonization with *Aspergillus* on arrival at the hospital [92]. In a case in which a laparotomy wound became infected by *A. fumigatus* within 48 hours of transfer of the patient from one hospital to another, DNA typing showed that the causative organism was in the air of the intensive care unit of the receiving hospital, a finding that suggests an extremely short incubation period [93].

### Prevention and Prophylaxis

In the hospital setting, patients at profound risk for aspergillosis should not be given pepper or spices that have not been sterilized [94]. Potted plants and shrubs probably pose some risk to patients, particularly if such plants are in the immediate vicinity of patients who are highly immunocompromised [84]. Local construction work is thought to be a major risk factor for highly immunocompromised patients such as bone marrow and liver transplant recipients and those with profound neutropenia [95], and some data suggest that complete separation of construction areas from clinical areas may reduce the risk to these patients [96]. The use of hepafiltration [97] and, in particular, laminar air flow [98, 99] reduces the risk of invasive aspergillosis but does not reduce it to zero, probably partly because patients are already colonized by *Aspergillus* when

they arrive at the hospital, partly because of breaks in airflow (e.g., during the provision of food or during bed linen changes), and partly because patients leave these protective environments to undergo investigations.

In addition, the sudden release of large quantities of spores that occurs on cleaning or when spores are shed from clothes may be undetectable by routine spore counts but are particularly dangerous. The effects of minibursts of spores can be minimized by increasing the air change rate in protective environments [100]. However, patients at particularly high risk such as bone marrow transplant recipients and liver and lung transplant recipients, neutropenic patients, and extensively burned patients should be housed in hepafiltered environments if possible. *Aspergillus* has been found in showerheads and hot water faucets, which could represent another risk for these patients [101].

Because *Aspergillus* is ubiquitous in the air and environment, the primary means of control is by filtering the air to remove all *A. fumigatus* spores, by using pharmaceutical agents active against *Aspergillus*, and (conceptually) by administering a vaccine. Although control of air is possible within the hospital, this measure is expensive, and it does not generally include all patients at risk. For example, patients with AIDS and those receiving corticosteroids are generally not housed in hepafiltered environments, which means that prevention may be possible for the highest-risk groups for limited periods but is not currently possible for all groups at risk in hospitals. Furthermore, patients at continuing risk, such as those who have undergone solid organ transplantation, are discharged home, and the home environment is a substantial source of *Aspergillus* spores.

Several different approaches to prophylaxis for invasive aspergillosis have been attempted [94, 102]. No study has yet convincingly shown that any means of prophylaxis is com-

pletely protective. Administration of aerosolized amphotericin B may be partially protective [103], and administration of intravenous amphotericin B is possibly partially protective [104]. Recent data are consistent with a protective effect of itraconazole solution [105]. The cost-benefit equation varies with the risk and has not been well quantitated. The widespread use of effective prophylaxis, should prophylaxis become available in the future, may substantially alter the epidemiology of invasive aspergillosis. However, it is unlikely that prophylaxis will be used for all patient groups at risk, and cases of invasive aspergillosis will continue to occur.

There is presently little likelihood that a vaccine for the prevention of invasive aspergillosis will be developed, although this would be desirable. Should such a vaccine become available in the future, it could be administered before transplantation for the majority of solid organ transplant recipients, between courses of chemotherapy for many patients with leukemia, and before bone marrow transplantation. It could also be used in patients with AIDS and in other patients likely to require intermittent large doses of corticosteroids. However, there are several impediments to the development of a vaccine. One impediment is the fact that humoral immunity appears to play an insignificant part in protection against invasive aspergillosis, although patients who recover from invasive aspergillosis develop antibodies to *Aspergillus* [106]. Whether certain antibodies to *Aspergillus* act as opsonins in vivo is unclear.

More detailed work on identifying major *Aspergillus* antigens and their interactions with various parts of the immune system is warranted to try to identify protective immunodominant epitopes. Further studies of the role of T helper cells may be important. Even if a vaccine were only partially protective and slowed the rate of disease progression, allowing aspergillosis to be diagnosed and successfully treated, this effect would be of substantial importance with respect to a disease with an

**Table 2.** Incidence of invasive aspergillosis according to underlying condition.

| Condition                              | Range (%) |
|----------------------------------------|-----------|
| Heart and lung or lung transplantation | 19–26*    |
| Chronic granulomatous disease          | 25–40†    |
| Acute leukemia                         | 5–24      |
| Allogeneic BMT                         | 4–9       |
| Autologous BMT without growth factors  | 0.5–6     |
| AIDS                                   | 0–12      |
| Liver transplantation                  | 1.5–10    |
| Heart and renal transplantation        | 0.5–10    |
| Severe combined immunodeficiency       | 3.5       |
| Burns                                  | 1–7       |
| Systemic lupus erythematosus           | 1         |
| Autologous BMT with growth factors     | <1        |

NOTE. Data are from [108]. BMT = bone marrow transplantation.

\* Distinguishing colonization from disease is particularly difficult in these patients.

† Lifetime incidence.

**Table 3.** Classification of invasive aspergillus infection.

|                                                                                                                                     |
|-------------------------------------------------------------------------------------------------------------------------------------|
| Infection associated with tissue damage, surgery, or a foreign body                                                                 |
| • Keratitis and/or endophthalmitis                                                                                                  |
| • Cutaneous infection (e.g., burn-associated aspergillosis)                                                                         |
| • Operative site infection (e.g., prosthetic valve endocarditis, wound infection after liver transplantation, and subdural empyema) |
| • Foreign body associated (e.g., Hickman catheter or other iv line or CAPD catheter)                                                |
| Infection predominantly in immunocompromised hosts                                                                                  |
| • Primary cutaneous aspergillosis, especially in leukemic children                                                                  |
| • Pulmonary aspergillosis                                                                                                           |
| Acute invasive                                                                                                                      |
| Chronic necrotizing aspergillosis                                                                                                   |
| • Airway aspergillosis                                                                                                              |
| Obstructing bronchial aspergillosis                                                                                                 |
| Invasive aspergillus tracheobronchitis                                                                                              |
| Ulcerative aspergillus tracheobronchitis                                                                                            |
| Pseudomembranous aspergillus tracheobronchitis                                                                                      |
| • Rhinosinusitis                                                                                                                    |
| • Disseminated aspergillosis, especially cerebral aspergillosis                                                                     |

NOTE. CAPD = continuous ambulatory peritoneal dialysis.

associated mortality that ranges from 50% to 100% despite therapy [107].

## Clinical Features

### Patterns of Disease

The incidence of invasive aspergillosis varies remarkably from center to center, and within centers, the disease tends to occur sporadically. Approximate incidence figures for different patient groups are shown in table 2.

The portals of entry for *Aspergillus* include the respiratory tract, damaged skin or other operative wounds, the cornea, and the ear. Infection arising from the gastrointestinal tract is possible but has never been clearly documented. Whichever the portal of entry is, that site is usually affected. The majority of patients (80%–90%) have pulmonary disease, but some have other manifestations of disease, including aspergillus rhinosinusitis. A clinically useful classification of invasive aspergillosis is shown in table 3. There may be local extension to the orbit from the sinuses. Local extension is distinct from disseminated disease, which refers to distant spread, presumably blood borne, from the portal of entry. Sometimes only one distant site, such as the brain, is affected.

Clinical manifestations of disease differ among patient groups. In an attempt to make these patterns of disease memorable for practicing clinicians, table 4 summarizes the typical clinical patterns in the major patient groups. In the following sections, the major body sites of disease will be described.

### Pulmonary Disease

The clinical presentation of invasive pulmonary aspergillosis varies with the patient group, as does the rate at which the

**Table 4.** Characteristic patterns of invasive aspergillosis in commonly affected patient groups.

| Underlying condition                                                                                                                                                             | Timing of invasive aspergillosis (% of cases)                                                        | Typical sites and features (% of cases)                                           | Comments                                                                                                                                                                                                                        |
|----------------------------------------------------------------------------------------------------------------------------------------------------------------------------------|------------------------------------------------------------------------------------------------------|-----------------------------------------------------------------------------------|---------------------------------------------------------------------------------------------------------------------------------------------------------------------------------------------------------------------------------|
| Acute leukemia; multiple myeloma, stage II/III; chronic leukemia in blast crisis; aplastic anemia and immunosuppressive treatment; autologous bone marrow or PSC transplantation | During induction chemotherapy (75); during maintenance or consolidation treatment (25)               | Lung (80–90); sinuses (5–10); other, e.g., brain (5–10)                           | High risk of fatal hemorrhage in lesions close to hilum of lung                                                                                                                                                                 |
| Allogeneic bone marrow or PSC transplantation, especially if matched unrelated or mismatched donor                                                                               | Early during neutropenia (20–30), late (median, 100 d), especially if grade II–III GVHD present (75) | Lung (80–90); sinuses (5–10); disseminated, including brain (5–20)                | Usually bilateral diffuse disease with poor outcome                                                                                                                                                                             |
| Liver transplantation                                                                                                                                                            | Variable, usually within 4 w of transplantation                                                      | Lung, brain, wound, disseminated                                                  | Distinguishing pulmonary shadows of aspergillosis from those of postoperative atelectasis and other infections difficult; distinguishing cerebral aspergillosis from other lesions clinically and radiologically is problematic |
| Lung transplantation                                                                                                                                                             | Variable                                                                                             | Airways, lung, disseminated, brain                                                | Distinguishing colonization of airways from invasion difficult                                                                                                                                                                  |
| Heart and kidney transplantation                                                                                                                                                 | Variable, often after treatment for rejection                                                        | Lung nodules that appear late or bilateral diffuse disease; disseminated          | Good prognosis if diagnosed                                                                                                                                                                                                     |
| HIV infection and AIDS                                                                                                                                                           | Late-stage AIDS, often with neutropenia and/or corticosteroid therapy                                | Any site, but upper-lobe thin- or thick-walled cavities and airway disease common | Subacute presentation, often mistaken for tuberculosis and other infections; poor prognosis; hemoptysis often fatal event (25% of cases)                                                                                        |
| Chronic granulomatous disease                                                                                                                                                    | Variable over lifetime                                                                               | Lung (70); chest wall (20); bone (10); disseminated (10–15)                       | Slowly progressive “cold” abscesses                                                                                                                                                                                             |
| Burns                                                                                                                                                                            | Usually within 2 mo of severe burns                                                                  | Superficial, leading to disseminated disease                                      | Progresses over 5–10 d to death, often unresponsive to medical therapy alone; amputation necessary if distal limb involved                                                                                                      |

NOTE. GVHD = graft-versus-host disease; PSC = peripheral stem cell.

disease progresses [109–129]. The most immunocompromised patients are those least likely to have symptoms, and progression is fast (e.g., 7–14 days from onset to death). Conversely, the least immunocompromised patients, such as diabetics or immunocompetent patients, usually have indolent symptomatic presentations that progress slowly (e.g., 2–3 months from onset to diagnosis).

*Acute invasive pulmonary aspergillosis.* Approximately 25%–33% of patients initially have no symptoms attributable to invasive pulmonary aspergillosis. As the disease progresses, symptoms appear. Early symptoms are cough (usually dry) and fever. Corticosteroid-treated patients often do not have fever, and low-grade chest pain, which may be pleuritic but is more commonly dull and nonspecific, is a frequent finding. A pleural rub is sometimes heard. Hemoptysis can occur, although it is rarely a presenting feature. Dyspnea is more common in patients with diffuse disease. The presentation in some patients is akin to that of pulmonary embolism. In neutropenic patients,

pneumothorax is an occasional presenting feature, and sharp chest pain with dyspnea is typical. The symptoms and signs of pulmonary zygomycosis are indistinguishable from those of invasive aspergillosis.

The prognosis of focal disease (and, in particular, nodular disease) is much more favorable than that of diffuse and bilateral disease, as focal disease tends to progress more slowly [111, 118, 130–131]. Resection is one therapeutic option that is not available to patients with bilateral diffuse or extensive disease. The only major problem for patients with focal disease is hemoptysis, which is often life-threatening and may occur without warning [112, 121, 124, 131].

Hypoxemia is usual in patients with diffuse disease, and hypocapnea is often present. WBC counts are usually normal, as is plasma chemistry. Elevated levels of bilirubin and lactate dehydrogenase are occasionally seen but are nonspecific findings. Coagulopathy may be present. The serum fibrinogen level is typically elevated in neutropenic patients with acute leukemia

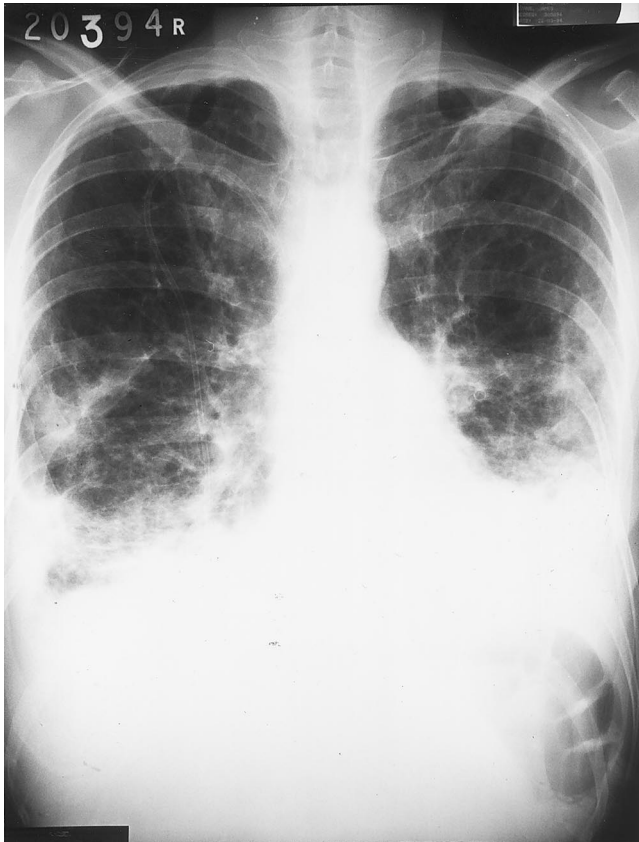

**Figure 3.** Chest radiograph of a patient with late-stage AIDS and probable invasive pulmonary aspergillosis, illustrating diffuse bilateral disease. The patient had cytomegalovirus retinitis and was receiving chemotherapy for Kaposi's sarcoma; he was symptomatic with a high fever and cough, and cultures of both sputum and bronchoalveolar lavage fluid yielded *Aspergillus fumigatus*.

[127]. The C-reactive protein level is often elevated, but its specificity as a marker for either fungal infection or invasive aspergillosis is in doubt.

The appearances of invasive aspergillosis on plain chest radiographs are extremely heterogeneous [109, 111–117, 121–123, 129, 131–137]. Cavitation and pleural-based, wedge-shaped lesions are the most distinctive appearances of invasive aspergillosis. Nodular shadows, with and without cavitation, thick- or thin-walled cavities (in patients with AIDS and chronic necrotizing pulmonary aspergillosis), and alveolar consolidation that coalesces over time to form small nodules are typical. Diffuse, usually lower-lobe, fine shadowing is also seen (figure 3). Pleural effusions are rare. In the context of neutropenia, spontaneous pneumothorax is also highly suggestive of invasive aspergillosis or zygomycosis. For solid organ transplant recipients, the major differential diagnoses of nodular disease are nocardiosis or lymphoma. The differential diagnosis of diffuse disease is not distinctive, and the performance of further diagnostic studies (e.g., bronchoalveolar lavage) is essential.

Early in the course of rapidly progressive invasive pulmonary aspergillosis, plain radiographs are often (falsely) negative, and thus high-quality CT scans of the chest can play a major role in early diagnosis [118, 127, 133, 134, 136, 138–142]. In neutropenic patients the most distinctive early lesions are small nodules and/or small pleural-based lesions with straight edges and surrounding low attenuation (the halo sign) (figure 4). There may be only one lesion, but often there are several. As the disease progresses, the nodules may cavitate (often as the neutrophil count recovers), resulting in the air crescent sign. Both the halo and air crescent signs are highly distinctive for invasive fungal disease of the lung, usually due to *Aspergillus* but also occasionally to a Mucorales, *Trichosporon*, *Blastoschizomyces*, or *Fusarium*. Pathoradiological correlative studies have conclusively shown that these lesions represent infarcted lung tissue full of hyphae that ramify beyond the area of infarction.

**Chronic invasive pulmonary aspergillosis.** Chronic invasive pulmonary aspergillosis is less common than acute disease. Underlying conditions include AIDS [121, 143], chronic granulomatous disease [144], diabetes mellitus [145], alcoholism [145], and corticosteroid therapy for chronic pulmonary disease such as sarcoidosis [146–148]; however, many patients do not have any immunocompromising factors [149–151]. In relatively immunocompetent patients with chronic invasive pulmonary aspergillosis, symptoms are more prominent, extend over weeks or months, and are similar to those of an aspergilloma. Chronic, productive cough is usual, often with mild or moderate hemoptysis. Fever is occasionally present but is usually low grade. Malaise and weight loss are usual. Local extension of

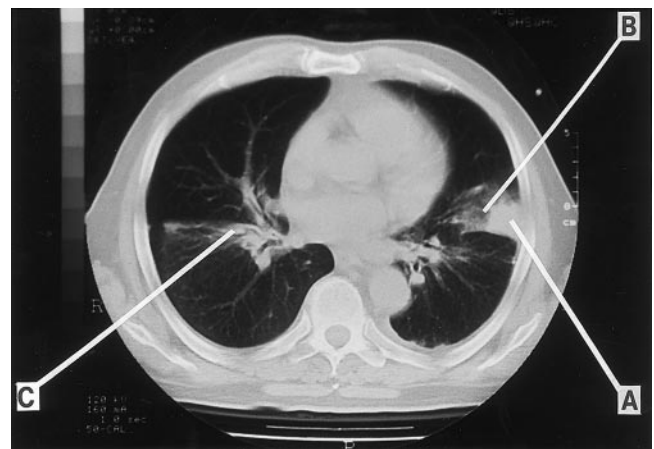

**Figure 4.** Thoracic CT scan of a neutropenic patient receiving treatment for acute myeloid leukemia who presented with low grade fever and chest-wall pain. A culture of sputum yielded *Aspergillus fumigatus*. An area of consolidation is apparent on the left side abutting the pleura and demarcated by an oblique fissure (A). Proximally the lesion has a low attenuation signal, described as the halo sign (B). There are also some areas of atelectasis on the right side, with features less characteristic of invasive aspergillosis but probably representing an additional site of disease (C).



disease into the chest wall, brachial plexus, or vertebral column is occasionally seen.

Cavitation that expands over time with surrounding consolidation in an area of lung that either did not have a cavity or previously had a small one is seen on radiographs. It can sometimes be difficult to distinguish an aspergilloma from chronic invasive pulmonary aspergillosis, particularly if a previous chest radiograph is not available. A cavitating lung tumor can have similar appearances.

Definitive diagnosis requires demonstration of *Aspergillus* hyphae in lung tissue and a culture-positive respiratory specimen. However, hyphae often are scant, and only granulomas are found, with cultures yielding *Aspergillus*. Different histological patterns have been described, including angioinvasive necrotizing granulomatous pneumonia, a granulomatous bronchiectatic cavity, and bronchocentric granulomatosis [152]. These patients are usually strongly positive for antibodies to *Aspergillus*, and this finding is helpful in inferring the diagnosis when biopsies are negative or contraindicated.

#### **Aspergillus Tracheobronchitis**

*Aspergillus* tracheobronchitis is proportionately more common in patients with AIDS [153] and in lung transplant recipients than in other immunocompromised patients [129, 154]; however, ~25% of patients are not apparently immunocompromised [153, 155]. Airway disease due to *Aspergillus* ranges from relatively mild tracheobronchitis with excess mucus production and inflammation to ulcerative tracheobronchitis with ulcers (often around the suture line in lung transplant recipients) and extensive pseudomembranous tracheobronchitis [154]. Distinguishing infection from colonization in lung transplant recipients can be problematic [156].

Approximately 80% of patients with *aspergillus* tracheobronchitis are symptomatic, although symptoms may be mild or reasonably attributable to another cause such as rejection after lung transplantation. These symptoms include cough, fever, and dyspnea (each present in <50% of patients); chest pain; and hemoptysis. As the disease progresses, symptoms become more common and more severe. Patients with pseudomembranous *aspergillus* tracheobronchitis may develop a unilateral monophonic wheeze or stridor, reflecting obstruction of the lumen of the airway with necrotic material and fungal material [157]. Many patients die of respiratory insufficiency secondary to occlusion of the airway; others develop disseminated disease in the last few days of life. Occasionally, perforation of the trachea or bronchi occurs.

A chest radiograph is usually normal early in the course of disease, but consolidation may occur later. CT findings include peribronchial consolidation and centrilobular nodules [158], but these findings are not specific. Performing bronchoscopy with bronchial biopsy, microscopy, and culture is the only means of making the diagnosis before death (figure 5). Biopsy of loose material in the tracheal lumen will often reveal necrotic

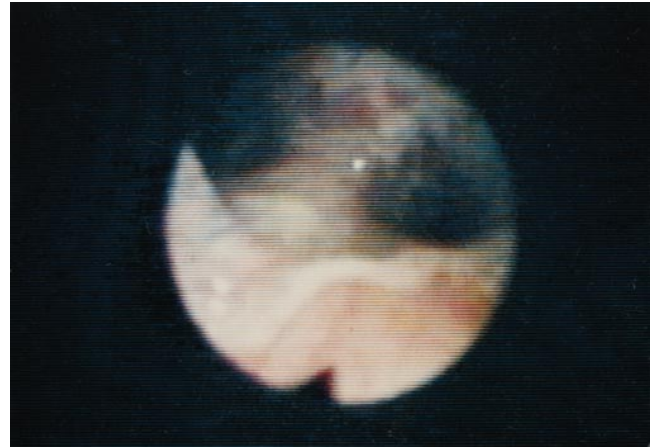

**Figure 5.** Bronchoscopic appearance of *aspergillus* tracheobronchitis in a lung transplant recipient; the mucosa is covered in a white mucus layer. (Courtesy of Dr. M. Kramer, Stanford University Medical Center, Stanford, CA.)

cartilage. Patients with pseudomembranous *aspergillus* tracheobronchitis have shaggy greyish linings of the whole trachea and bronchial wall. Therapy with an azole appears to be superior to that with systemic amphotericin B for this disease [154]. The role of aerosolized amphotericin B has not been well evaluated but appears minor, and this agent may cause significant bronchospasm.

#### **Invasive Aspergillus Sinusitis**

The term invasive *aspergillus* sinusitis embraces at least three distinct disease entities. Acute rhinosinusitis is a relatively common manifestation of invasive aspergillosis in neutropenic and bone marrow transplant recipients [119, 159–162] (table 4). Invasive *aspergillus* sinusitis appears to be extremely uncommon in solid organ transplant recipients [163]. Chronic invasive *aspergillus* sinusitis occurs in healthy or only mildly immunocompromised patients [164–167], and a variant of this disease, paranasal *aspergillus* granuloma, is seen in the tropics [168, 169]. *A. flavus* is proportionately more common as a cause of *aspergillus* sinusitis [163].

*Acute invasive aspergillus rhinosinusitis.* Early symptoms are nonspecific and easily mistaken for possible bacterial infection [159]. Fever, cough, epistaxis, and headache are common. Other occasional symptoms include nasal discharge, sinus pain, and sore throat. Findings on examination of the anterior nares may initially be unremarkable. A careful search for insensitive areas with decreased nasal blood flow that precedes frank crusting or ulceration is particularly important. Invasive *aspergillus* sinusitis is frequently the only focus of *aspergillus* disease, although local extension to the palate [170, 171], orbit, or brain is common and relatively rapid. *Aspergillus* sinusitis may occur concurrently with pulmonary aspergillosis.

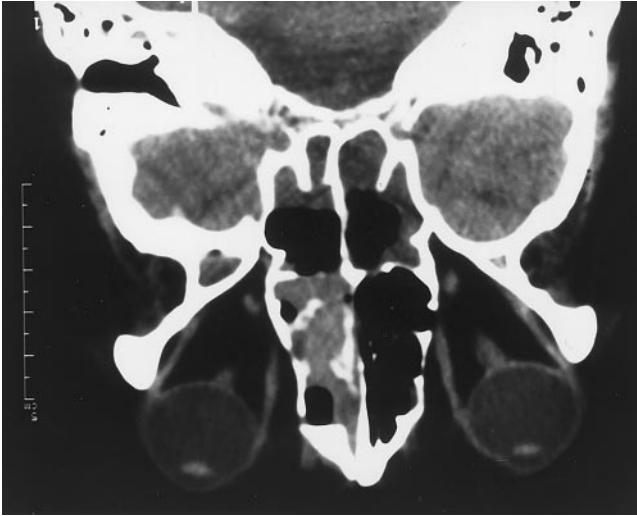

**Figure 6.** CT scan of the sinuses of an allogeneic bone marrow transplant recipient with diabetes showing aspergillus rhinosinusitis. The sphenoid sinus is partially opacified, and the left anterior nasal passage is completely opacified. Cultures of material from the sphenoid sinus yielded *Aspergillus fumigatus*.

Plain radiographs of the sinuses are insensitive and do not allow distinction between bacterial and fungal infection [159, 162]. CT scans show fluid opacification of the sinuses (figure 6), and any bony destruction and spread into adjacent tissues are well visualized. MRI scans also are useful. T<sub>1</sub>-weighted images tend to appear similar to those associated with bacterial sinusitis (e.g., they may be isointense or show decreased signal intensity), but T<sub>2</sub>-weighted images show very decreased signal intensity compared with those of bacterial sinusitis, which show increased signal intensity.

The diagnosis can be inferred if typical clinical and radiographic features are present along with a positive culture of a lesion or the finding of characteristic hyphae in tissue, and the diagnosis is confirmed if both are present.

The cornerstone of treatment is the administration of amphotericin B, as treatment with itraconazole appears to be less effective. Radical surgery may be associated with major complications [145] and appears to offer no survival advantage [172]. Response to treatment, with subsequent relapse during episodes of neutropenia or relapses of leukemia, is typical. If uncontrolled by a combination of antifungal therapy, recovery from neutropenia, and possibly surgery, local extension to the palate, facial skin, orbit, or brain, with a fatal outcome, is characteristic.

*Chronic invasive aspergillus sinusitis.* Most patients with chronic invasive aspergillosis have no discernible immunocompromising factors, although a substantial minority are diabetics, drink alcohol to excess, or have AIDS [121, 145, 164–167, 173]. The clinical presentation of chronic invasive sinusitis depends on how far the disease has progressed. It cannot be distinguished clinically from other fungal causes of chronic

sinusitis. In addition, early cases are similar in presentation to saprophytic aspergillus sinusitis and can be distinguished only by radiographic and histopathologic examination of the sinus mucosa and/or bone. As the disease progresses, usually over months, the clinical features of local involvement become apparent. Visual symptoms are common and include diplopia, unilateral blindness, pain in the eye, and proptosis. Headaches, loss or impairment of smell, and the features of chronic sinusitis (e.g., nasal stuffiness) are also common. Fever is almost universally absent.

The radiological features of this disease are similar to those of acute disease [166, 174]. Bony destruction may occur without direct fungal invasion, apparently due either to a “pressure” effect or to local toxin production (speculative). However, bony invasion by hyphae may be underrecognized histopathologically because of the nature of the surgery required to remove abnormal tissue.

Invasion of mucosa and other tissue by fungal hyphae is the hallmark of disease, although in cases of chronic invasive aspergillus sinusitis, few hyphae are seen, and the diagnosis may be missed. Cultures are usually positive but may require multiple samples.

*Aspergillus sphenoid sinusitis* requires particular mention because of its frequent devastating complications, which include major visual disturbance, brain abscess, or stroke and/or death due to involvement of the carotid artery [175–178]. Approximately 10% of all cases of sphenoid sinusitis are due to *Aspergillus*, the commonest fungal pathogen [176]. Another intractable complication of aspergillus sinusitis is osteomyelitis of the base of the skull [179].

For both forms of chronic invasive aspergillus sinusitis, surgical debridement, followed by prolonged antifungal therapy, is required [145]. Chronicity and relapse characterize this disease.

### Disseminated Aspergillosis

At autopsy, many patients who die of or with invasive aspergillosis have disseminated disease [2, 3, 109, 119, 155, 180–188]. Before death, dissemination is often suspected but rarely proven unless cerebral or cutaneous aspergillosis is diagnosed. Jaundice and disseminated intravascular coagulation are often seen in the terminal stages of disseminated aspergillosis; the precise reasons for these findings are not well delineated.

### Cutaneous Aspergillosis

Cutaneous aspergillosis is most commonly seen in neutropenic patients at intravenous-catheter insertion sites [189–191] or around the catheter site as a result of adhesive dressings applied to the skin [191–195]. Aspergillosis is one cause of invasive fungal dermatitis in premature neonates [196] and may occur in children with AIDS [197]. Cutaneous aspergillosis is occasionally a manifestation of disseminated aspergillosis [119], in which case diagnosis of the systemic disease can be

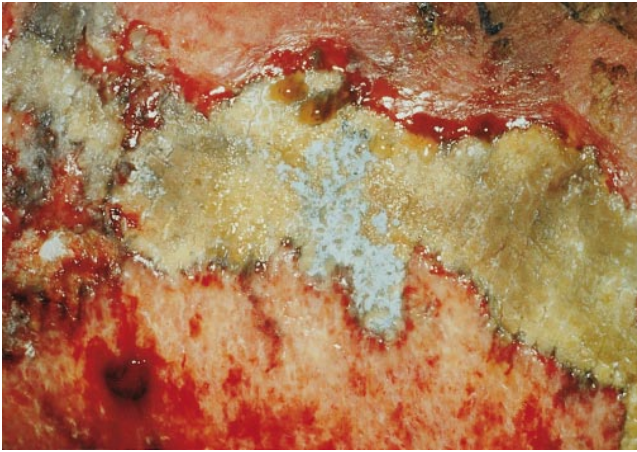

**Figure 7.** *Aspergillus fumigatus* growing and sporulating in a burn on a 7-year-old boy with 50% full thickness burns; he later died.

achieved rapidly with microscopic examination and culture of a skin biopsy specimen.

The clinical appearance of cutaneous aspergillosis is very similar to that of pyoderma gangrenosum, which is caused more commonly by *Pseudomonas aeruginosa*. Initially, an area of raised erythema is present that rapidly increases in size with accompanying discomfort or pain. The center of the lesion changes from red to purple and finally to black and may ulcerate. Histologic examination reveals invasion of local blood vessels and infarction of the skin, corresponding to the visual appearances. The rate of progression of the lesion usually corresponds to the patient's immune status, in that patients without circulating neutrophils tend to have rapidly progressive disease, whereas those with some neutrophils will have disease that progresses over several days.

*Aspergillus* may also invade burns [97, 198–200] (table 4), causing a rapidly progressive necrotic lesion that is usually

refractory to treatment with amphotericin B (figure 7). Both cutaneous and burn-associated aspergillosis are clinically indistinguishable from infection caused by the Mucorales unless *Aspergillus* sporulates, in which case direct microscopy will provide an etiologic diagnosis to the genus level. Surgical or other wounds may also be infected with *Aspergillus* acquired either perioperatively or postoperatively [93]. This occurrence appears to be relatively common among liver transplant recipients (table 4), perhaps because of the long duration of surgery [201], large operative site, and the presence of immunosuppression.

Apart from burn-associated aspergillosis, cutaneous aspergillosis responds better to therapy than do most other manifestations of invasive aspergillosis, perhaps because the diagnosis is made rapidly and with confidence [145].

**Cerebral Aspergillosis**

Cerebral aspergillosis occurs in 10%–20% of all cases of invasive aspergillosis, and only rarely is the brain the sole site of infection [202–216]. The clinical presentation and pace of progression of cerebral aspergillosis, like pulmonary aspergillosis, vary remarkably with the host group. The most immunocompromised patients present with nonspecific findings (i.e., alteration in mental status and seizures) shortly before death, whereas those slightly less immunocompromised are more likely to have focal features and headache. Fever sometimes occurs but may be attributed to other coexistent infections. Meningism occurs rarely.

For highly immunocompromised patients, the appearance of cerebral aspergillosis on CT scans is that of one or multiple hypodense, well-demarcated lesions (figure 8) [212, 213, 217–219]. Hemorrhage and mass effect are unusual. For patients with normal peripheral WBC counts, the findings of ring enhancement and surrounding edema are more frequent [217].

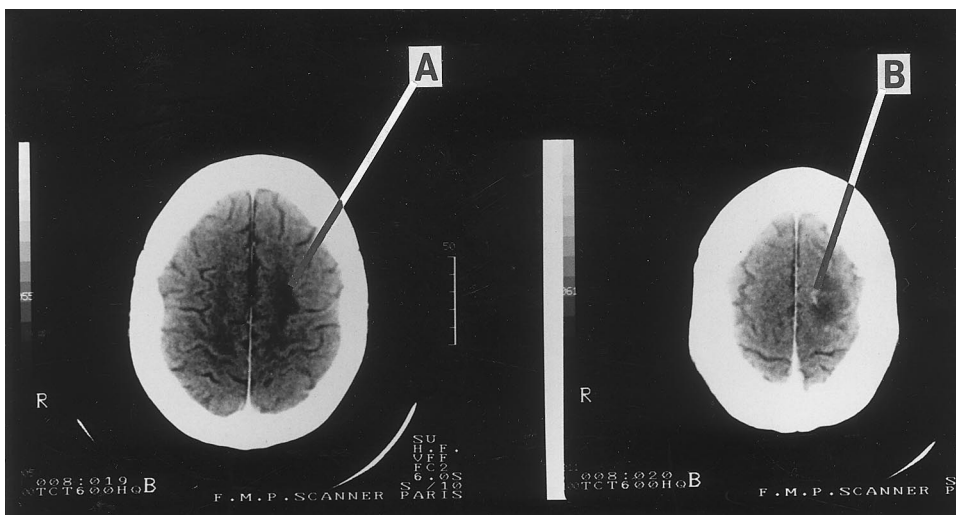

**Figure 8.** CT scan of the brain in a neutropenic recipient of an allogeneic bone marrow transplant showing a hypodense lesion (A) with slight enhancement medially (B), typical of invasive aspergillosis. He also had cavitating pulmonary lesions although the diagnosis of invasive aspergillosis was not proven.

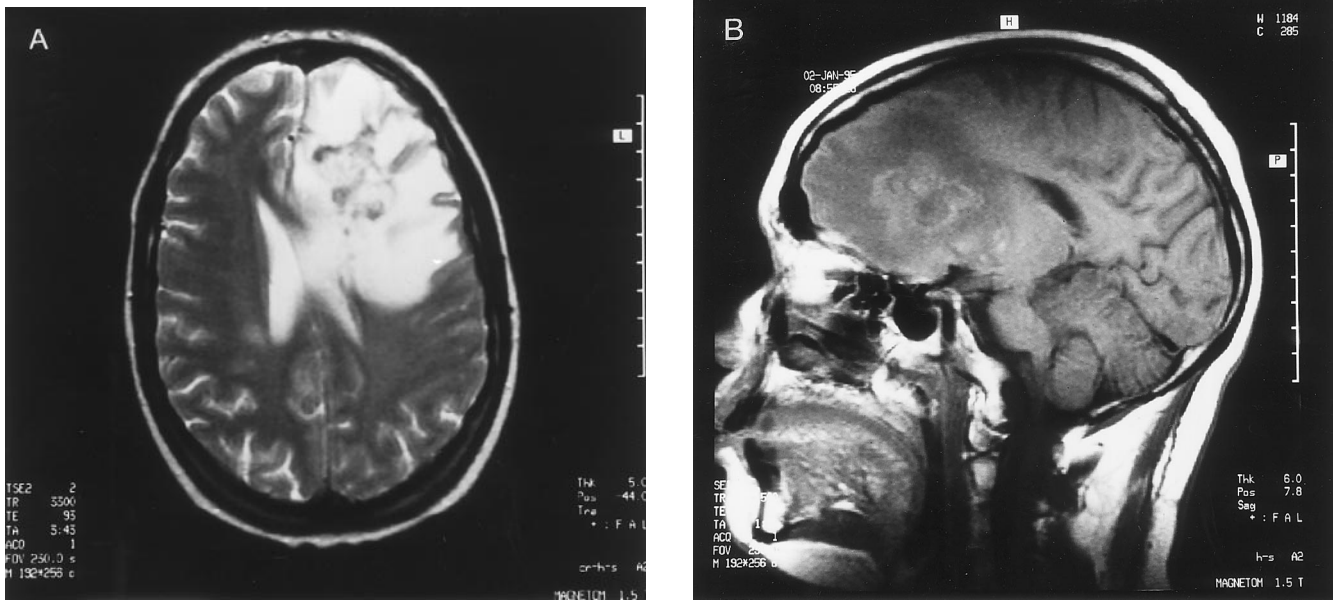

**Figure 9.** A, magnetic resonance scan ( $T_2$ -weighted) of the brain from an allogeneic bone marrow transplant recipient with graft-versus-host disease. He also had diffuse pulmonary disease and cultures of sputum and bronchoalveolar lavage fluid positive for *Aspergillus fumigatus*. The scan shows a multiloculated abscess with much surrounding edema. B,  $T_1$ -weighted sagittal image of same patient showing the large abscess and surrounding edema, although it is less obvious than on the  $T_2$ -weighted image.

Clearer definition of a hypodense lesion is sometimes obtained with use of intravenous contrast. MRI scans often reveal additional lesions without distinctive features (figures 9A and B) [213, 220]. These lesions are usually deep-seated and hard to access surgically. For less immunocompromised patients, a mass lesion with surrounding edema and midline shift, usually with contrast enhancement, is a typical finding [208, 217]. Many of these lesions are frontal or are in the area of the cerebellopontine angle.

Differential diagnoses depend on the host group. *Aspergillus* accounts for about half of the cases of brain abscess in bone marrow transplant recipients, and *Candida* species account for one quarter of the cases [213]. In liver transplant recipients, *Aspergillus* is the commonest infectious cause of brain abscess, but cerebral infarction and hemorrhage are more common causes of radiological abnormalities [206, 209]. In other solid organ transplant recipients, cerebral aspergillosis and nocardiosis are seen with approximately equal frequency; toxoplasmosis, cryptococcosis, and lymphoma are less frequent. In patients with AIDS, cerebral toxoplasmosis is a much more common cause of cerebral abscess, as is lymphoma. CSF findings are usually abnormal but nonspecific [205, 212]. It is important to rule out other differential diagnoses.

Definitive diagnosis requires biopsy or aspiration of a cerebral lesion, but performance of these procedures is often precluded by a patient's clinical status or by coagulation problems. An inferential diagnosis is possible if invasive aspergillosis is documented at other sites and a typical radiographic abnormality of the brain is observed.

#### Unusual Forms of Invasive Aspergillosis

There are many unusual or rare manifestations of invasive aspergillosis (figure 10). Some patients are immunocompromised, but most are not. Neonates, intravenous drug abusers, and patients who have undergone surgery are most commonly affected. A summary of these manifestations is provided in table 5; many of them have been reviewed previously [145, 220], but case reports that update these reviews continue to be published.

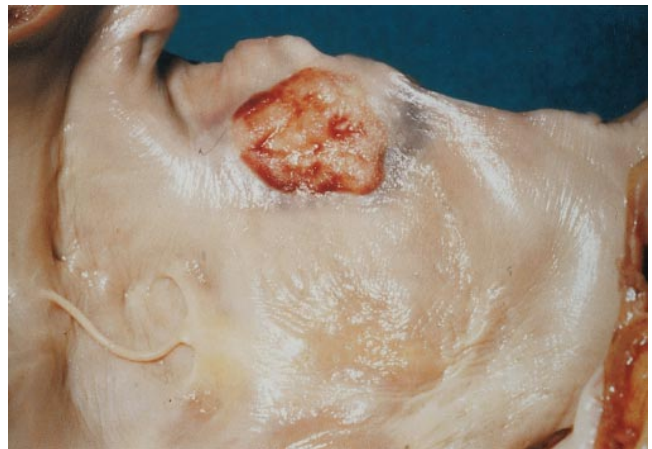

**Figure 10.** Macroscopic appearance of aspergillus endocarditis in an immunocompetent intensive care unit patient. Large vegetations are characteristic of this infection but not specific. (Courtesy of Dr. G. Wilson, North Manchester General Hospital.)

**Table 5.** Unusual forms of invasive aspergillosis.

| Site, disease          | Risk factor, typical host                                                              | Optimal diagnostic approach                                                                                                               | Optimal therapeutic approach                                                                                             | Outcome (assuming appropriate therapy)                   |
|------------------------|----------------------------------------------------------------------------------------|-------------------------------------------------------------------------------------------------------------------------------------------|--------------------------------------------------------------------------------------------------------------------------|----------------------------------------------------------|
| Epiglottitis           | Leukemia                                                                               | Culture, with or without biopsy, with protection of the airway                                                                            | iv/po therapy                                                                                                            | Poor                                                     |
| Larynx                 | Nonimmunocompromised                                                                   | Biopsy and culture                                                                                                                        | Removal of nodules, with or without po therapy                                                                           | Good                                                     |
| Bronchial stump        | Lung resection with silk sutures                                                       | Culture                                                                                                                                   | Removal of sutures, with or without po therapy                                                                           | Good                                                     |
| Empyema                | Postsurgical removal of aspergilloma                                                   | Aspiration of cavity and culture                                                                                                          | Exteriorization of cavity, with po therapy                                                                               | Chronic disease                                          |
| Onychomycosis          | Nonimmunocompromised                                                                   | Microscopy and culture of nail and subungual debris                                                                                       | po therapy                                                                                                               | Good                                                     |
| Endophthalmitis        | Disseminated aspergillosis, iv drug abuse, penetrating eye injury                      | Vitrectomy and intraoperative microscopy and culture of whole vitrectomy specimen on appropriate media, depending on microscopic findings | Partial or complete vitrectomy, 5–7.5 mg intravitreal amphotericin B, iv amphotericin B and flucytosine                  | Loss of vision likely                                    |
| Meningitis             | Aspergillus sinusitis, iv drug abuse, neurosurgery, mild immunocompromising conditions | CSF culture or meningeal biopsy, CSF antibody or antigen detection                                                                        | iv/po therapy                                                                                                            | Good                                                     |
| Endocarditis           | Cardiac surgery, immunocompromised                                                     | Echocardiography (large vegetations), microscopy or culture of peripheral emboli, fungal blood culture                                    | Valve replacement, iv amphotericin B                                                                                     | Fatal without surgery                                    |
| Vascular graft         | Nonimmunocompromised                                                                   | Culture of material from graft or localized extension of infection                                                                        | Removal of graft and fashioning of extra-anatomic bypass, iv/po therapy                                                  | Good if infected graft removed                           |
| Pericardium            | Neutropenia                                                                            | Pericardiocentesis or pericardiectomy                                                                                                     | iv/po therapy                                                                                                            | Poor, as diagnosis often late                            |
| Gastrointestinal tract | Immunocompromised                                                                      | Biopsy of ulcer                                                                                                                           | iv/po therapy                                                                                                            | Poor, as diagnosis often late                            |
| Peritoneum             | Chronic ambulatory peritoneal dialysis                                                 | High-volume fungal culture of dialysate, (?) antigen detection                                                                            | Removal of catheter, iv/po therapy                                                                                       | Good if diagnosis made                                   |
| Liver                  | Leukemia                                                                               | Imaging and biopsy (culture may be negative, but other foci of aspergillosis often apparent)                                              | iv/po therapy, delay in cytotoxic chemotherapy for a short time                                                          | Reasonable, although leukemia relapse likely             |
| Thyroid                | Many                                                                                   | Aspiration of lesion for culture and microscopy                                                                                           | iv/po therapy                                                                                                            | Poor, as usually a manifestation of disseminated disease |
| Renal parenchyma       | Immunocompromised                                                                      | Aspiration of lesion for culture and microscopy, urine culture                                                                            | iv/po therapy                                                                                                            | Poor as usually a manifestation of disseminated disease  |
| Renal pelvis           | Mildly immunocompromised (e.g., diabetes)                                              | Culture and microscopy of urine fungus balls, culture of urine or nephrostomy drainage                                                    | Relief of hydronephrosis, nephrectomy if unilateral, iv/po therapy and local irrigation with amphotericin B if bilateral | Poor for affected kidney(s), otherwise good              |
| Bone                   | Mixed, especially chronic granulomatous disease                                        | Biopsy with microscopy and culture                                                                                                        | Surgical debridement if localized, po therapy                                                                            | Reasonable but long-term treatment necessary.            |

## Diagnostic Approaches

The diagnostic approach to invasive aspergillosis in immunocompromised patients offers a useful paradigm for many opportunistic infections, for many reasons. First, invasive aspergillosis occurs in many different host groups, some of whom are at risk for short periods of time and some of whom are at risk for years. Second, invasive aspergillosis is relatively uncommon, and therefore, few physicians or surgeons have sufficient experience with the disease to feel entirely comfortable with either their diagnostic or therapeutic approach. Third, invasive aspergillosis has a variable and non-specific clinical presentation, so a high index of suspicion is called for. Fourth, there is no single diagnostic test that is either universally applicable or sensitive or specific enough to establish the diagnosis. Finally, delay in the initiation of therapy is usually fatal.

Thus, several diagnostic approaches need to be taken rapidly to confirm or refute the diagnosis once an opportunistic infection is suspected. Detailed radiological evaluation is essential. This should be done with CT or MR imaging within 24 hours after the diagnosis is suspected. Occasionally, *Aspergillus* affects other organs of the body, and ultrasonography or CT may be useful in these situations. Once a lesion has been identified and characterized, the best diagnostic approach can then be decided on. For peripheral pulmonary lesions, the procedure of choice is needle biopsy or surgical resection of the lesion. For focal lesions near the hilum and the great vessels in the lung, particularly in neutropenic patients, urgent thoracotomy and resection should be considered (regardless of the presence of neutropenia or thrombocytopenia) because the risk of life-threatening hemoptysis is sufficiently high to warrant the relatively low surgical risks. For patients with bilateral alveolar or multifocal disease in whom surgical resection is impossible, the best procedures are bronchoscopy and bronchoalveolar lavage.

## Microscopy and Culture

Fluid obtained by bronchoalveolar lavage, bronchial lavage, or endotracheal aspiration should be processed for microscopy or cytology, fungal culture, and any other procedures appropriate for ruling out differential diagnoses (e.g., immunofluorescence for *Pneumocystis*). Combining microscopy and culture will increase the diagnostic yield by 15%–20% [221–223] over that with culture alone (especially if the patient is receiving empirical antifungal therapy [224]), and, of course, microscopy is relatively rapid (figure 11). The use of special stains for fungi (such as calcofluor white) probably increases the sensitivity of microscopy, although this has not been systematically studied in the context of invasive aspergillosis. Microscopy is particularly useful in the context of airway and wound aspergillosis because fruiting bodies are sometimes seen, allowing direct identification of the pathogen with some confidence. Microscopy is also particularly useful for small-volume

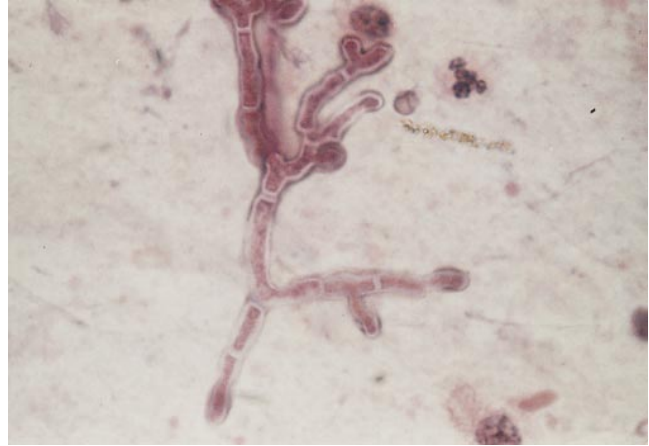

**Figure 11.** High-power view of *Aspergillus* hyphae found in the sputum of a patient colonized with *Aspergillus*. Microscopy or bronchoalveolar lavage and other sterile fluids are particularly useful means of detecting mold infections quickly. (Courtesy of Dr. G. Armstrong, Hope Hospital; original magnification,  $\times 400$ .)

specimens obtained by aspiration of an abscess, an infected sinus, or a pulmonary lesion.

While microscopy is moderately sensitive and absolutely specific for fungal infection, it does not allow unequivocal confirmation of the diagnosis of invasive aspergillus infection because several other fungi may have similar microscopic and histological appearances. Such fungi include *Scedosporium apiospermum* (*Pseudallescheria boydii*), *Fusarium* species, *Scopulariopsis* species, and others. Immunohistochemistry is useful for distinguishing organisms seen in tissue but not grown in culture [225]. Culture of *Aspergillus* from an infected sterile site provides definitive proof of disease, allows the species to be determined, and allows the organism to be tested for susceptibility. For this reason, the performance of fungal cultures is appropriate and clinically useful. The yield from specimens is higher if specific fungal media are used [36] even though *Aspergillus* is capable of growth on blood agar and other bacterial media.

Occasionally, cultures are falsely positive in highly immunocompromised patients, and these results clearly lead to suspicion of disease [118, 126, 128, 129, 224]. In the case of respiratory specimens from patients who are clinically well but highly immunocompromised (e.g., bone marrow transplant recipients), the clinical presumption should be that such patients have acute invasive aspergillosis until proven otherwise.

## Serology for *Aspergillus*

Fluids and aspirates from infected lesions may also be tested by serological methods such as specific ELISA and/or by molecular diagnostic methods, although blood is the usual sample tested. The use of serological assays has focused on detecting galactomannan. The early latex agglutination tests were highly

specific [226] but not very sensitive ( $\sim 30\%$  [227]). More recent assay procedures, such as sandwich ELISA, are considerably more sensitive (1 ng/mL of antigen can be detected, compared with 25 ng/mL with the latex test) but, unfortunately, have a false positivity rate of  $\sim 10\%$  [227]. Such tests have been applied only to hematology patients. Routine screening, performed two-to-three times per week, provides the highest detection rate. The recently developed G-test, which detects circulating 1,3- $\beta$ -D-glucan with use of a modification of the limulus assay for endotoxin, has a sensitivity of  $\sim 20$  pg/mL [228, 229]. Prospective studies of the utility of the G-test have shown that it can detect 1,3- $\beta$ -D-glucan in the context of confirmed invasive mycoses, including invasive aspergillosis, but it does not distinguish between species of *Candida*, *Aspergillus*, or other major fungi. Sera from patients with aspergillomas may also be G-test positive [228, 229], although this condition should be distinguishable on a clinical basis.

Testing for antibodies to *Aspergillus* has been performed for solid organ transplant recipients as a means of alerting clinicians to a possible diagnosis of invasive aspergillosis. Recently published early data on heart transplant recipients and more conclusive data on lung transplant recipients [230] suggest that this procedure is another valuable adjunct to assist clinicians in identifying patients who need further evaluation. Antibodies to *Aspergillus* may be detectable in other patients with invasive aspergillosis, but the sensitivity and specificity of this test are low, and in most instances the test becomes positive as a patient's condition starts to improve after initiation of therapy. However, detecting antibodies may be useful for patients with chronic invasive aspergillosis.

Molecular diagnostic approaches are in their infancy but are likely to become clinical reality over the next decade. Detection of *Aspergillus* DNA in blood would be most useful [231]. Pulmonary specimens may yield false-positive results because of the presence of extraneously introduced or colonizing spores [232–234]. In addition, information on susceptibility is not obtained.

Thus, the diagnosis of invasive aspergillosis is based ideally on histological documentation of typical hyphae and a positive culture for *Aspergillus*. In clinical practice such a diagnosis is infrequently achieved, and clinical management has to proceed pragmatically with the accumulation of symptomatic, radiological, and microbiological criteria that offer different levels of certainty of the diagnosis. Waiting for definitive proof of a diagnosis of invasive aspergillosis before therapy is initiated in patients with this disease places such patients in mortal danger from progression of the disease. However, for patients with chronic invasive aspergillosis, diagnostic procedures should proceed therapy. Anticipating the pace of the disease is critically important in determining optimal management.

## Treatment

The mortality associated with invasive aspergillosis is nearly 100% if the disease is not treated [107]. The only untreated

survivors are patients whose immunocompromising factors are removed (e.g., corticosteroid therapy is permanently stopped). The rate of progression of invasive aspergillosis varies widely. In patients such as liver and bone marrow transplant recipients and those with profound neutropenia, the course of disease from the appearance of the first clinical or radiological abnormality to death is typically 10–14 days. The diagnosis is often difficult to establish, and several days usually elapse between consideration of the diagnosis and partial or complete confirmation. A critical window of opportunity may be missed if treatment is not started early, with fatal consequences for patients. A culture positive for *Aspergillus*, microscopy showing the presence of hyphae, or a combination of appropriate radiological features are all sufficient to warrant starting therapy in patients at risk for this infection.

## Antifungal Agents

There are currently only two antifungal agents with activity against *Aspergillus*—amphotericin B and itraconazole (table 6). The overall success rate with amphotericin B therapy is 34% (table 7) but varies substantially between different host groups. Similar response rates are seen with itraconazole. The lipid-associated formulations of amphotericins B appear to be equally efficacious but not more so.

Therefore, if a patient is able to take oral therapy, has good intestinal function, and is eating and not taking drugs that induce the metabolism of cytochrome P-450 (e.g., rifampin, phenytoin, phenobarbital, or carbamazepine), then itraconazole would be a reasonable first choice. Patients with intestinal problems (such as graft-versus-host disease) and patients with AIDS absorb itraconazole poorly. For adults, the dose of itraconazole should be 200 mg t.i.d. for 4 days, followed by 200 mg twice daily [235]; all doses of capsules should be taken with food, but the liquid formulation should be taken without food. Higher doses may be helpful for patients with cerebral aspergillosis [236] (table 7). Serum concentrations of itraconazole should be measured 5–10 days after treatment is begun. Interactions with other drugs are problematic, including that with cyclosporine (halve dose and measure levels), digoxin (monitor levels), antihistamines (stop), and protease inhibitors (observe patients carefully).

If a patient is not a suitable candidate for oral therapy as outlined above, then intravenous therapy is necessary. The dose of conventional amphotericin B should be 0.8–1.0 mg/(kg·d), regardless of the presence of renal dysfunction; neutropenic patients, for whom 1–1.25 mg/(kg·d) is appropriate, are the exception. The degree of renal dysfunction can be reduced by administering saline, and the degree of hypokalemia can be reduced by administering amiloride. If renal dysfunction is or is likely to be a major problem, as in cyclosporine-treated patients or patients intolerant of amphotericin B or the fungal infection progresses despite treatment with an adequate dose of conventional amphotericin B, then one of the lipid-associated preparations of amphotericin B in doses of 4–5 mg/(kg·d) (or

**Table 6.** First- and second-line therapy for invasive aspergillosis.

| Agent                               | Initial dose                                   | Comments                                                                                                                                                                      |
|-------------------------------------|------------------------------------------------|-------------------------------------------------------------------------------------------------------------------------------------------------------------------------------|
| Amphotericin B deoxycholate         | 0.8–1.25 mg/(kg·d), iv                         | Considered first-line therapy but high failure rate; significant interaction with cyclosporine                                                                                |
| Itraconazole                        | 200 mg t.i.d. for 4 d, then 200 mg b.i.d., po* | Useful if a patient is eating and not receiving cytochrome P-450 inducers; significant interaction with cyclosporine; levels should be measured to ensure adequate absorption |
| Amphotericin B colloidal dispersion | 4–6 mg/(kg·d), iv                              | Less nephrotoxic than amphotericin B deoxycholate                                                                                                                             |
| Liposomal amphotericin B            | 1–5 mg/(kg·d), iv†                             | Less nephrotoxic than amphotericin B deoxycholate                                                                                                                             |
| Amphotericin B lipid complex        | 5 mg/(kg·d), iv                                | Less nephrotoxic than amphotericin B deoxycholate                                                                                                                             |

NOTE. None of these agents or regimens have been compared in controlled trials, but all have been shown to be partially effective.

\* For cerebral aspergillosis, consider 400 mg b.i.d.

† In neutropenic patients with invasive pulmonary aspergillosis, 1 mg/(kg·d) is probably equivalent to 4 mg/(kg·d), but whether this is true for other patients is not clear.

itraconazole) is appropriate [237–243]. Recent data on patients with invasive pulmonary aspergillosis whose neutropenia resolved are consistent with the suggestion that 1 mg/(kg·d) of AmBisome (Nexstar, San Dimas, CA) is equivalent to 4 mg/(kg·d), although the failure rates with both regimens were considerable [244]. Recommended doses of Amphocil (Amphotec; Sequus Pharmaceuticals, Menlo Park, CA) and Abelcet (Liposome Co., Princeton, NJ) are 4 mg/(kg·d) and 5 mg/(kg·d), respectively. These dosages are my preferred option, at least until the progression of disease has been arrested. These dosages should be continued for at least 2 weeks, until a therapeutic response has been obtained.

Unfortunately, first-line therapy fails in at least 50% of patients. Deciding when therapy has failed can be difficult. For patients with rapidly progressive disease, failure of the first regimen means a fatal outcome. However, for patients with more slowly

progressive disease, the evaluation of response after 10–20 days of therapy can usually be made on the basis of clinical and radiological criteria. The less immunocompromised the patient, the longer it takes to evaluate response. Many patients will respond to alternative therapy if first-line therapy fails.

There is no a priori total dose of amphotericin B that should be given. The key to success is giving a high enough dose in the first 2 weeks of therapy and switching therapy if it is failing. Some clinicians give 2 g or 2.5 g of amphotericin B, but there is no scientific basis for this practice. Consolidation therapy with itraconazole is often appropriate, often for long periods. Relapse occurs even after months of therapy if patients remain immunocompromised. Bone marrow transplantation or further cancer chemotherapy may be possible for patients with invasive aspergillosis during remission induction therapy if secondary prophylaxis is administered [245–249]. Caution should be exercised in using azoles for this indication as they may potentiate chemotherapy toxicity by interfering with the metabolism of some cytotoxic agents [250].

Several novel agents are under investigation, including azoles and echinocandins. The most advanced azole is the broad-spectrum triazole voriconazole (UK-109,496; Pfizer, New York), which has shown good clinical efficacy and tolerability among immunocompromised patients with invasive aspergillosis [251]. Randomized trials are ongoing.

#### Resistance and Susceptibility Testing

In vitro resistance of *A. fumigatus* to itraconazole (confirmed in an animal model) has just been described [252, 253], although the frequency of this resistance is probably low. Different degrees of susceptibility to itraconazole have been found for different *Aspergillus* species: *A. flavus* and *A. terreus* are

**Table 7.** Response to treatment of invasive aspergillosis among immunocompromised patients (or survival among untreated patients).

| Site of infection | No. of patients who responded or survived/total no. (%) |                     |                    |              |
|-------------------|---------------------------------------------------------|---------------------|--------------------|--------------|
|                   | Untreated                                               | Treated for 1–13 d* | Treated for ≥14 d* | All treated* |
| Lung              | 0/101                                                   | 1/65 (1)            | 90/179 (50)        | 91/244 (37)  |
| Sinuses           | ...                                                     | 0/11                | 17/35 (49)         | 17/46 (37)   |
| Brain             | 0/49                                                    | 0/8                 | 0/7                | 0/15 (0)     |
| Total             | 0/150                                                   | 1/94 (1)            | 107/221 (48)       | 108/315 (34) |

NOTE. Data are from [107].

\* All patients were treated with amphotericin B deoxycholate except 75 patients with AIDS who were treated with either amphotericin B or itraconazole or both (25% response rate).



generally more susceptible in vitro than are other species [38]. Furthermore, "in vivo resistance" of *A. fumigatus* to amphotericin B that cannot yet be detected by in vitro susceptibility testing has been shown in an animal model [254]. Given the development of resistance, more aggressive performance of cultures to detect *Aspergillus* for species-specific identification and susceptibility testing is appropriate.

### Surgical Excision

Surgery has value in the treatment of focal invasive pulmonary aspergillosis, for persisting lung shadows before bone marrow transplantation or for more aggressive chemotherapy, for significant hemoptysis, and for lesions impinging on the great vessels or major airways [118, 127, 145, 246, 247, 255]. Extensive surgical debridement is often useful for invasive sinus aspergillosis but should not be done until recovery from neutropenia as hemorrhage and other operative complications are frequent in neutropenic patients [145, 172]. Surgery, other than diagnostic aspiration or biopsy, has no role for patients with cerebral aspergillosis. Other surgical approaches are described in table 5.

### Cytokine Therapy

Therapy with cytokines, as an adjunct to antifungal therapy, is possibly of value. Increasing the numbers of circulating granulocytes and monocytes in patients who have been neutropenic may be critical, but the temporal impact is small. Granulocyte colony-stimulating factor, granulocyte-macrophage colony-stimulating factor, and  $\gamma$ -IFN also act by increasing phagocytosis of and damage to *Aspergillus* hyphae in vitro [72, 76–78]. Whether the magnitude of these effects is clinically important, in combination with the effect of antifungals, has yet to be clinically demonstrated; it was not in phase 1/2 studies of macrophage colony-stimulating factor [256].

### Outcome

Factors contributing to a poor outcome for patients with invasive aspergillosis are shown in table 8. There are substan-

**Table 8.** Factors predicting a poor response to therapy, other than host group and site of disease, in patients with invasive aspergillosis.

- |                                                                                                                                                                                                                                                                                                                                                                                                                                                                                                                              |
|------------------------------------------------------------------------------------------------------------------------------------------------------------------------------------------------------------------------------------------------------------------------------------------------------------------------------------------------------------------------------------------------------------------------------------------------------------------------------------------------------------------------------|
| <ul style="list-style-type: none"> <li>• Leukemic relapse</li> <li>• Persistent neutropenia</li> <li>• No reduction in immunosuppression</li> <li>• Diffuse pulmonary disease</li> <li>• Major hemoptysis</li> <li>• Delayed therapy</li> <li>• Low doses of amphotericin B, especially during neutropenia</li> <li>• Undetectable or very low serum itraconazole concentrations</li> <li>• Lack of secondary prophylaxis during another episode of neutropenia</li> <li>• Histological evidence of angioinvasion</li> </ul> |
|------------------------------------------------------------------------------------------------------------------------------------------------------------------------------------------------------------------------------------------------------------------------------------------------------------------------------------------------------------------------------------------------------------------------------------------------------------------------------------------------------------------------------|

NOTE. Data are from [227].

tial variations from patient group to patient group and within each patient group. For patients with leukemia, achieving complete remission is critical to survival [257]. Avoidance of hemoptysis by performing surgery, even during episodes of profound neutropenia, is critical to the survival of patients with proximal lung disease. Cerebral aspergillosis is still associated with a mortality of >95% among immunocompromised patients. Advances in therapy for invasive aspergillosis will follow from a greater understanding of pathogenesis, better and more sensitive diagnostics, education of clinicians, development of superior antifungal agents, and, possibly, adjunctive immunotherapy.

### References

1. Rankin NE. Disseminated *aspergillosis* and moniliasis associated with agranulocytosis and antibiotic therapy. *Br Med J* **1953**;183:918–9.
2. Groll AH, Shah PM, Mentzel C, Schneider M, Just-Neubling G, Huebling G, Huebner K. Trends in the postmortem epidemiology of invasive fungal infections at a university hospital. *J Infect* **1996**;33:23–32.
3. Yamazaki T, Kume H, Yamashita E, Murase S, Arisawa M. Epidemiology of visceral mycoses: analysis on data in "Annual of the Pathological Autopsy Cases in Japan" [abstract P-117]. In: 13th Congress of the International Society for Human and Animal Mycology (Parma, Italy). **1997**.
4. Mayer AC. *Deutsch Arch Physiol* **1815**.
5. Micheli PA. *Nova plantarum genera juxta Tournefortii methodum disposita*. Florence, Italy: Bernardo Paperini, **1729**.
6. Bennett JH. On the parasitic vegetable structures found growing in living animals. *Transactions of the Royal Society of Edinburgh* **1842**;15:277–9.
7. Rayer. Fioriep's N. *Notixen* **1842**.
8. Mayer. *Aspergillus* otomycosis. *Müller's Archiv für Anat u Phys* **1844**;12:404.
9. Fresenius G. *Beitrage zur mykologie*. Frankfurt, Germany: HL Bronner, **1850**;1:81–2.
10. Leber T. Keratomycosis aspergillina als ursache von hypopyonkeratitis. *Arch Ophthalmol* **1879**;25:285–301.
11. Boström. Demonstration mikroskopischer. *Preparare von Schimmelpilzen Berliner Klin Woch* **1886**;20:332.
12. Popoff LW. Ein fall von mycosis aspergillina nebst einigen Bemerkungen über aenliche Erkrankungen der Respirationjswege. *Varsovie* **1887**;3:316.
13. Wheaton SW. Case primarily of tubercle, in which a fungus (*aspergillus*) grew in the bronchi and lung, simulating actinomycosis. *Transactions of the Pathological Society of London* **1890**;41:34–7.
14. Ross. Vorläufige Mittheilung über einige Fälle von Mycosis in Menschen. *Zentralbl, für Bakt. und Parasitenkunde* **1891**;9:504–7.
15. Zarniko C. *Aspergillus* mykose der kieferhöhle. *Dtsch Med Wochenschr* **1891**;44:1222.
16. Oppe W. Zur kenntniss der schimmelmikosen bei den menschen. *Z Allge Mein Med* **1897**;8:301–6.
17. Just E. *Aspergillus*abszess des grosshirns. *Mitt Grenzgeb Med Chir* **1931**;42:540–9.
18. Shaw FW, Warthen HJ. *Aspergillosis* of bone. *South Med J* **1936**;29:1070–1.
19. Cawley EP. *Aspergillosis* and the aspergilli. *Arch Intern Med* **1947**;80:423–34.
20. Zimmerman LE. *Candida* and *Aspergillus* endocarditis. With comments on the role of antibiotics in dissemination of fungus disease. *Arch Pathol* **1950**;50:591–605.

21. Hinson KFW, Moon AJ, Plummer NS. Broncho-pulmonary aspergillosis. A review and a report of eight new cases. *Thorax* **1952**;7:317–33.
22. Zimmerman LE. Fatal fungus infections complicating other diseases. *Am J Clin Pathol* **1955**;25:46–65.
23. Finegold SM, Will D, Murray JF. Aspergillosis. A review and report of twelve cases. *Am J Med* **1959**;27:463–82.
24. Newman WH, Cordell AR. *Aspergillus* endocarditis after open heart surgery: report of a case and review of literature. *J Thorac Cardiovasc Surg* **1964**;48:652–60.
25. Milosev B, Davidson CM, Gentles JC, Sandison AT. Aspergillosis of paranasal sinuses and orbit in northern Sudanese. *Lancet* **1966**;1:746–7.
26. Young RC, Bennett JE, Vogel CL, Carbone PP, DeVita VT. Aspergillosis; the spectrum of the disease in 98 patients. *Medicine (Baltimore)* **1970**;49:147–73.
27. Katzenstein A-LA, Sale SR, Greenberger PA. Allergic aspergillus sinusitis: a newly recognised form of sinusitis. *J Allergy Clin Immunol* **1983**;72:89–93.
28. Gairdner WT. Clinical retrospect of cases treated during the session 1855–1856 (November-March); including remarks upon the more important fatal cases, and upon the cases of inflammation of the lungs treated during that period. *Edinburgh Medical Journal* **1856**;1:969–84.
29. Virchow VR. Beiträge zur lehre von den beim menschen vorkommenden pflanzlichen parasiten. *Virchows Archiv* **1856**;557.
30. Rénon L. Étude sur l'aspergilliose chez les animaux et chez l'homme. Paris: Masson et Cie, **1897**.
31. Link HF. Observaciones in ordines plantarum naturales. Igesellschaft Naturforschender Freunde zu Berlin, *Magazin* **1809**;3:1.
32. Thom C, Church MB. "The Aspergilli." Baltimore: Williams and Wilkins, **1926**.
33. Thom C, Raper KB. "A manual of the Aspergilli." Baltimore: Williams and Wilkins, **1945**.
34. Raper BK, Fennel JD. The genus *Aspergillus*. Baltimore: Williams & Wilkins, **1965**.
35. Samson RA, Pitt JI, eds. Modern concepts in *Penicillium* and *Aspergillus* classification. New York: Plenum Press, **1990**.
36. Horvath JA, Dummer S. The use of respiratory-tract cultures in the diagnosis of invasive pulmonary aspergillosis. *Am J Med* **1996**;100:171–8.
37. Hall LA, Denning DW. Oxygen requirements of *Aspergillus* species. *J Med Microbiol* **1994**;41:311–5.
38. Verweij PE, Mensink M, Rijs AJ, Donnelly JP, Meis JF, Denning DW. In vitro activity of amphotericin B, itraconazole and voriconazole against 151 clinical and environmental *Aspergillus fumigatus* isolates [abstract E90]. In: Program and abstracts of the Interscience Conference on Antimicrobial Agents and Chemotherapy (Toronto). Washington, DC: American Society for Microbiology, **1997**.
39. Ng TTC, Robson GD, Denning DW. Hydrocortisone-enhanced growth of *Aspergillus* spp: implications for pathogenesis. *Microbiology* **1994**;140:2475–80.
40. Pitt JI. The current role of *Aspergillus* and *Penicillium* in human and animal health. *J Med Vet Mycol* **1994**;1:17–21.
41. Parta M, Chang Y, Rulong S, Pinto-Da Silva P, Kwon-Chung KJ. *HYP1*, a hydrophobin gene from *Aspergillus fumigatus*, complements the rodletless phenotype in *Aspergillus nidulans*. *Infect Immun* **1994**;62:4389–95.
42. Thau N, Monod M, Crestani B, et al. Rodletless mutants of *Aspergillus fumigatus*. *Infect Immun* **1994**;62:4380–8.
43. Penalver MC, Casanove M, Martinez JP, Gil ML. Cell wall protein and glycoprotein constituents of *Aspergillus fumigatus* that bind to polystyrene may be responsible for the cell surface hydrophobicity of the mycelium. **1996**;142:1597–604.
44. Tronchin G, Bouchara J-P, Larcher G, Lissitzky J-C, Chabasse D. Interaction between *Aspergillus fumigatus* and basement membrane laminin: binding and substrate degradation. *Biol Cell* **1993**;77:201–8.
45. Bouchara JP, Larcher G, Joubard F, Penn P, Tronchin G, Chabasse D. Extracellular fibrinolytic enzyme of *Aspergillus fumigatus*: substrate-dependent variations in the proteinase synthesis and characterization of the enzyme. *FEMS Immunol Med Microbiol* **1993**;7:81–92.
46. Monod M, Fatih A, Jatou-Ogay K, Paris S, Latgé JP. The secreted proteases of pathogenic species of *Aspergillus* and their possible role in virulence. *Canadian Journal of Botany* **1995**;73 (suppl 1):S1081–6.
47. Markaryan A, Morozova I, Yu H, Kolattukudy PE. Purification and characterization of an elastolytic metalloprotease from *Aspergillus fumigatus* and immunoelectron microscopic evidence of secretion of this enzyme by the fungus invading the murine lung. *Infect Immun* **1994**;62:2149–57.
48. Reichard U, Monod M, Odds F, Rütchel R. Virulence of an aspergillopepsin-deficient mutant of *Aspergillus fumigatus* and evidence for another aspartic proteinase linked to the fungal cell wall. *J Med Vet Mycol* **1997**;35:189–96.
49. Arruda LK, Mann BJ, Chapman MD. Selective expression of a major allergen and cytotoxin, Asp f1, in *Aspergillus fumigatus*. Implications for the immunopathogenesis of *Aspergillus*-related diseases. *J Immunol* **1992**;149:3354–9.
50. Latgé JP, Moutaouakil M, Debeaupuis JP, Bouchara JP, Haynes K, Prévoost MC. The 18-kilodalton antigen secreted by *Aspergillus fumigatus*. *Infect Immun* **1991**;59:2586–94.
51. Smith JM, Davies JE, Holden DW. Construction and pathogenicity of *Aspergillus fumigatus* mutants that do not produce the ribotoxin restriction. *Mol Microbiol* **1993**;9:1071–7.
52. Birch M, Robson G, Law D, Denning DW. Evidence of multiple phospholipase activities of *Aspergillus fumigatus*. *Infect Immun* **1996**;64:751–5.
53. Ebina K, Sakagami H, Yokota K, Kondo H. Cloning and nucleotide sequence of cDNA encoding Asp-hemolysin from *Aspergillus fumigatus*. *Biochim Biophys Acta* **1994**;1219:148–50.
54. Müllbacher A, Waring P, Eichner RD. Identification of an agent in cultures of *Aspergillus fumigatus* displaying anti-phagocytic and immunomodulating activity in vitro. *J Gen Microbiol* **1985**;131:1251–8.
55. Sutton P, Newcombe NR, Waring P, Müllbacher A. Exacerbation of invasive aspergillosis by the immunosuppressive fungal metabolite, gliotoxin. *Immunol Cell Biol* **1996**;74:318–22.
56. Waring P. DNA fragmentation induced in macrophages by gliotoxin does not require protein synthesis and is preceded by raised inositol triphosphate levels. *J Biol Chem* **1990**;265:14476–80.
57. Denning DW. Aflatoxin and human disease. A review. *Adverse Drug Reactions and Acute Poisoning Reviews* **1987**;4:175–209.
58. Birch M, Drucker DB, Boote V, Denning DW. Prevalence of phthoic acid in *Aspergillus* spp. *J Med Vet Mycol* **1997**;35:143–54.
59. Frisvad JC, Samson RA. Chemotaxonomy and morphology of *Aspergillus fumigatus* and related taxa. In: Samson RA, Pitt JI, eds. Modern concepts in *Penicillium* and *Aspergillus* classification. New York: Plenum Press, **1990**:201–7.
60. Moss MO. Biosynthesis of *Aspergillus* toxins—non-aflatoxins. In: Powell KA, Peberdy JF, Renwick A, eds. The genus *Aspergillus*. New York: Plenum Press, **1994**:29–50.
61. Jatou-Ogay K, Paris S, Huerre M, et al. Cloning and disruption of the gene encoding an extracellular metalloprotease of *Aspergillus fumigatus*. *Mol Microbiol* **1994**;14:917–28.
62. Chris Tomee JF, Wierenhga ATJ, Hiemstra PS, Kauffman HF. Proteases from *Aspergillus fumigatus* induce release of proinflammatory cytokines and cell detachment in airway epithelial cell lines. *J Infect Dis* **1997**;176:300–3.
63. Holdom MD, Hay RJ, Hamilton AJ. The Cu, Zn superoxide dismutases of *Aspergillus flavus*, *Aspergillus niger*, *Aspergillus nidulans*, *Aspergillus terreus*: purification and biochemical comparison with the *Aspergillus fumigatus*, Cu, Zn superoxide dismutase. *Infect Immun* **1996**;64:3326–32.

64. Hearn VM, Wilson EV, MacKenzie DWR. Analysis of *Aspergillus fumigatus* catalases possessing antigenic activity. *J Med Microbiol* **1992**; 36:61–7.
65. Takasuka T, Anderson MJ, Arisawa M, Denning DW. Possible contribution of catalase to pathogenicity of *Aspergillus fumigatus* [abstract 0–21]. In: Proceedings of the 13th Congress of the International Society for Human and Animal Mycology. Parma, Italy: International Society for Human and Animal Mycology, **1997**.
66. Calera JA, Paris S, Monod M, et al. Cloning and disruption of the antigenic catalase gene of *Aspergillus fumigatus*. *Infect Immun* **1997** (in press).
67. Birkinshaw JH, Charles JHV, Hetherington AC, Raistrick H. Studies in the biochemistry of micro-organisms. Part IX—On the production of mannitol from glucose by species of *Aspergillus*. *Philos Trans R Soc Lond B Biol Sci* **1931**;B22:153–71.
68. Wong B, Brauer KL, Tsai RR, Jayasimhulu K. Increased amounts of the *Aspergillus* metabolite D-mannitol in tissue and serum of rats with experimental aspergillosis. *J Infect Dis* **1989**;160:95–103.
69. Megson GM, Law D, Haynes KA, Drucker DB, Ganguli LA, Denning DW. The application of serum mannitol determinations for the diagnosis of invasive pulmonary aspergillosis in bone marrow transplant patients [abstract]. *J Infect* **1994**;28(suppl):58.
70. Schaffner A, Douglas H, Braude A. Selective protection against conidia by mononuclear and against mycelia by polymorphonuclear phagocytes in resistance to *Aspergillus*: observations on these two lines of defense in vivo and in vitro with human and mouse phagocytes. *J Clin Invest* **1982**;69:617–31.
71. Diamond RD, Krzesicki R, Epstein B, Jao W. Damage to hyphal forms of fungi by human leukocytes in vitro: a possible host defense mechanism in aspergillosis and mucormycosis. *Am J Pathol* **1978**;91:313–28.
72. Roilides E, Holmes A, Blake C, Venzon D, Pizzo PA, Walsh TJ. Antifungal activity of elutriated human monocytes against *Aspergillus fumigatus* hyphae: enhancement by granulocyte-macrophage colony-stimulating factor and interferon- $\gamma$ . *J Infect Dis* **1994**;170:894–9.
73. Kozel TR, Wilson MA, Farrel TP, Levitz SM. Activation of C3 and binding to *Aspergillus fumigatus* conidia and hyphae. *Infect Immun* **1989**;57:3412–7.
74. Roilides E, Holmes A, Blake C, Pizzo PA, Walsh TJ. Impairment of neutrophil antifungal activity against hyphae of *Aspergillus fumigatus* in children infected with human immunodeficiency virus. *J Infect Dis* **1993**;167:905–11.
75. Gustafson TL, Schaffner W, Lavelly GB, Stratton CW, Johnson HK, Hutcheson RH Jr. Invasive aspergillosis in renal transplant recipients: correlation with corticosteroid therapy. *J Infect Dis* **1983**;148:230–8.
76. Roilides E, Unlig K, Venzon D, Pizzo PA, Walsh TJ. Prevention of corticosteroid-induced suppression of human polymorphonuclear leukocyte-induced damage of *Aspergillus fumigatus* hyphae by granulocyte colony-stimulating factor and gamma interferon. *Infect Immun* **1993**;61:4870–7.
77. Roilides E, Blake C, Holmes A, Pizzo PA, Walsh TJ. Granulocyte-macrophage colony-stimulating factor and interferon- $\gamma$  prevent dexamethasone-induced immunosuppression of antifungal monocyte activity against *Aspergillus fumigatus* hyphae. *J Med Vet Mycol* **1996**;34:63–9.
78. Rex JH, Bennett JE, Gallin JI, Malech HL, DeCarlo ES, Melnick DA. In vivo interferon- $\gamma$  therapy augments the in vitro ability of chronic granulomatous disease neutrophils to damage *Aspergillus* hyphae. *J Infect Dis* **1991**;163:849–52.
79. Cenci E, Perito S, Ennsle KH, et al. Th1 and Th2 cytokines in mice with invasive aspergillosis. *Infect Immun* **1997**;65:564–70.
80. de Repentigny L, Petitbois S, Boushira M, et al. Acquired immunity in experimental murine aspergillosis is mediated by macrophages. *Infect Immun* **1993**;61:3791–802.
81. Mullins J, Harvey R, Seaton A. Sources and incidence of airborne *Aspergillus fumigatus* (Fres). *Clin Allergy* **1976**;6:209–17.
82. Simmonds EJ, Littlewood JM, Hopwood V, Evans EGV. *Aspergillus fumigatus* colonisation and population density of place of residence in cystic fibrosis. *Arch Dis Child* **1994**;70:139–40.
83. Nolard N, Detand M, Beguin H. Ecology of *Aspergillus* species in the human environment. In: Vanden Bosche H, Mackenzie DWR, Cauwenbergh G, eds. *Aspergillus* and aspergillosis. New York: Plenum Press, **1988**:35–41.
84. Staib F. Ecological and epidemiological aspects of aspergilli pathogenic for man and animal in Berlin (West). *Zentralbl Bakteriell Mikrobiol Hyg [A]* **1984**;257:240–5.
85. Birch M, Anderson MJ, Denning DW. Molecular typing of *Aspergillus*. *J Hosp Infect* **1995**;30(suppl):339–51.
86. Denning DW, Clemons KV, Hanson LH, Stevens DA. Restriction endonuclease analysis of total cellular DNA of *Aspergillus fumigatus* isolates of geographically and epidemiologically diverse origin. *J Infect Dis* **1990**;162:1151–8.
87. Denning DW, Shankland G, Stevens DA. DNA fingerprinting of *Aspergillus fumigatus* isolates from patients with aspergilloma. *J Med Vet Mycol* **1991**;29:339–45.
88. Anderson MJ, Gull K, Denning DW. Molecular typing by random amplification of polymorphic DNA and M13 Southern hybridisation of related paired isolates of *Aspergillus fumigatus*. *J Clin Microbiol* **1996**;34:87–93.
89. Debeaupuis JP, Sarfati J, Chazalet V, Latge JP. Genetic diversity among clinical and environmental isolates of *Aspergillus fumigatus*. *Infect Immun* **1997**;19:3080–5.
90. Birch M, Nolard N, Shankland G, Denning DW. DNA typing of epidemiologically-related isolates of *Aspergillus fumigatus*. *Infect Epidemiol* **1995**;114:161–8.
91. Gerson SL, Talbot GH, Hurwitz S, Strom BL, Lusk EJ, Cassileth PA. Prolonged granulocytopenia: the major risk factor for invasive pulmonary aspergillosis in patients with acute leukemia. *Ann Intern Med* **1984**;100:345–51.
92. Martino P, Raccach R, Gentile G, Venditti M, Girmenia C, Mandelli F. *Aspergillus* colonization of the nose and pulmonary aspergillosis in neutropenic patients: a retrospective study. *Haematologica* **1989**;74:263–5.
93. Carlson GL, Birch M, Mughal MM, Denning DW. *Aspergillus* wound infection following laparostomy. *J Infect* **1996**;33:119–22.
94. Beyer J, Schwartz S, Heinemann V, Siegert W. Strategies in prevention of invasive pulmonary aspergillosis in immunosuppressed or neutropenic patients. *Antimicrob Agents Chemother* **1994**;66:911–7.
95. Walsh TJ, Dixon DM. Nosocomial aspergillosis: environmental microbiology, hospital epidemiology, diagnosis and treatment. *Eur J Epidemiol* **1989**;5:131–42.
96. Loo VG, Bertrand C, Dixon L, et al. Control of construction-associated nosocomial aspergillosis in an antiquated hematology unit. *Infect Control Hosp Epidemiol* **1996**;17:360–4.
97. Levenson C, Wohlford P, Djou J, Evans S, Zawacki B. Preventing post-operative burn wound aspergillosis. *J Burn Care Rehabil* **1991**;12:132–5.
98. Sherertz RJ, Belani A, Kramer BS. Impact of air filtration on nosocomial *Aspergillus* infections. Unique risk of bone marrow transplant recipients. *Am J Med* **1987**;83:709–18.
99. Barnes RA, Rogers TR. Control of an outbreak of nosocomial aspergillosis by laminar air-flow isolation. *J Hosp Infect* **1989**;14:89–94.
100. Rhame FS. Prevention of nosocomial aspergillosis. *J Hosp Infect* **1991**;18 (suppl A):466–72.
101. Anaissie EJ, Monson TP, Penzak SR, Stratton SL. Opportunistic fungi recovered from hospital water systems [abstract J-93]. In: Program and abstracts of the 37th Interscience Conference on Antimicrobial Agents and Chemotherapy (Toronto). Washington, DC: American Society for Microbiology, **1997**.

102. British Society for Antimicrobial Chemotherapy Working Party on Fungal Infection (Cohen J, Denning DW, Hay RJ, MacKenzie DWR, Prentice AG, Rogers TRF, Speller DCE, Warnock DW, Warren RE). Chemoprophylaxis for candidiasis and aspergillosis in neutropenia and transplantation: a review and recommendations. *J Antimicrob Chemother* **1993**;32:5–21.
103. Conneally E, Cafferkey MT, Daly PA, Keane CT, McCann SR. Nebulized amphotericin B as prophylaxis against invasive aspergillosis in granulocytopenic patients. *Bone Marrow Transplant* **1990**;5:403–6.
104. Rousey SR, Russler S, Gottlieb M, Ash RC. Low-dose amphotericin B prophylaxis against invasive *Aspergillus* infections in allogeneic marrow transplantation. *Am J Med* **1991**;91:484–9.
105. Morgenstern GR, Prentice AG, Prentice HG, Ropner JE, Schey SA, Warnock DW. Fluconazole vs itraconazole for antifungal prophylaxis in neutropenic patients [abstract 92]. In: Proceedings of the 4th Trends in Invasive Fungal Infections (Barcelona). **1997**.
106. Barnes RA. *Aspergillus* infection: does serodiagnosis work? Serodiagnosis and Immunotherapy of Infectious Disease **1993**;5:135–8.
107. Denning DW. Therapeutic outcome in invasive aspergillosis. *Clin Infect Dis* **1996**;23:608–15.
108. Denning DW. Invasive aspergillosis in immunocompromised patients. *Current Opinion in Infectious Diseases* **1994**;7:456–62.
109. Young RC, Bennett JE, Vogel CL, Carbone PP, DeVita VT. Aspergillosis; the spectrum of the disease in 98 patients. *Medicine (Baltimore)* **1970**;49:147–73.
110. Degregorio MW, Lee WMF, Linkera CA, Jacobs RA, Curt AR. Fungal infections in patients with acute leukemia. *Am J Med* **1982**;73:543–8.
111. Weiland D, Ferguson RM, Peterson PK, Snover DC, Simmons RL, Najarian JS. Aspergillosis in 25 renal transplant patients. Epidemiology, clinical presentation, diagnosis, and management. *Ann Surg* **1983**;198:622–9.
112. Abelda SM, Talbot H, Gerson SL, Miller WT, Cassileth PA. Pulmonary cavitation and massive hemoptysis in invasive pulmonary aspergillosis. Influence of bone marrow recovery in patients with acute leukemia. *Am Rev Respir Dis* **1985**;131:115–20.
113. Gerson SL, Talbot H, Lusk E, Hurwitz S, Strom BL, Cassileth PA. Invasive pulmonary aspergillosis in adult acute leukemia: clinical clues to its diagnosis. *J Clin Oncol* **1985**;3:1109–16.
114. Spearing RL, Pamphilon DH, Prentice AG. Pulmonary aspergillosis in immunosuppressed patients with hematological malignancies. *Q J Med* **1986**;59:611–25.
115. Martino P, Girmenia C, Venditti M, et al. Spontaneous pneumothorax complicating pulmonary mycetoma in patients with acute leukemia. *Rev Infect Dis* **1990**;12:611–7.
116. Denning DW, Follansbee S, Scolaro M, Norris S, Edelstein D, Stevens DA. Pulmonary aspergillosis in AIDS. *N Engl J Med* **1991**;324:654–62.
117. Weinberger M, Elattar Inas PH, Marshall D, et al. Patterns of infection in patients with aplastic anemia and the emergence of *Aspergillus* as a major cause of death. *Medicine (Baltimore)* **1992**;71:24–43.
118. McWhinney PHM, Kibbler CC, Hamon MD, et al. Progress in the diagnosis and management of aspergillosis in bone marrow transplantation: thirteen years' experience. *Clin Infect Dis* **1993**;17:397–404.
119. Morrison VA, Haake RJ, Weisdorf DJ. The spectrum of non-*Candida* fungal infections following bone marrow transplantation. *Medicine (Baltimore)* **1993**;72:78–89.
120. Singh N, Miele L, Yu VL, Gayowski T. Invasive aspergillosis in liver transplant recipients: association with candidemia and consumption coagulopathy and failure of prophylaxis with low-dose amphotericin B. *Clin Infect Dis* **1993**;17:906–8.
121. Khoo S, Denning DW. *Aspergillus* infection in the acquired immune deficiency syndrome. *Clin Infect Dis* **1994**;19 (suppl 1):541–548.
122. End A, Helbich T, Wisser W, Dekan G, Klepetko W. The pulmonary nodule after lung transplantation: cause and outcome. *Chest* **1995**;107:1317–22.
123. von Eiff M, Zuhlsdorf M, Roos N, Hesse M, Schulten R, van de Loo J. Pulmonary fungal infections in patients with hematological malignancies—diagnostic approaches. *Ann Hematol* **1995**;70:135–41.
124. Pagano L, Ricci P, Nosari A, et al. Fatal haemoptysis in pulmonary filamentous mycosis: an undervalued cause of death in patients with acute leukemia in haematological complete remission. A retrospective study and review of the literature. *Br J Haematol* **1995**;89:500–5.
125. Guillemin R, Lavarde V, Amrein C, Chevalier P, Guinvarc'h A, Glotz D. Invasive aspergillosis after transplantation. *Transplant Proc* **1995**;27:1307–9.
126. Yelandi V, Laghi F, McCabe MA, et al. *Aspergillus* and lung transplantation. *J Heart Lung Transplant* **1995**;14:883–90.
127. Caillot D, Casasnovas O, Bernard A, et al. Improved management of invasive pulmonary aspergillosis in neutropenic patients using early thoracic computed tomographic scan and surgery. *J Clin Oncol* **1997**;15:139–47.
128. Wald A, Leisenring W, van Burik J-A, Bowden RA. Epidemiology of *Aspergillus* infections in a large cohort of patients undergoing bone marrow transplantation. *J Infect Dis* **1997**;175:1459–66.
129. Westney GE, Kesten S, de Hoyos A, Chaparro C, Winton T, Maurer JR. *Aspergillus* infection in single and double lung transplant recipients. *Transplantation* **1996**;61:915–9.
130. Tumbarello M, Tacconelli E, Pagano L, et al. Comparative analysis of prognostic indicators of aspergillosis in hematological malignancies and HIV infection. *J Infect* **1997**;34:55–60.
131. Miller WT Jr, Sais GJ, Frank I, Gefter WB, Aronchick JM, Miller WT. Pulmonary aspergillosis in patients with AIDS. Clinical and radiographic correlations. *Chest* **1994**;105:37–44.
132. Orr DP, Myerowitz RL, Dubois PJ. Patho-radiologic correlation of invasive pulmonary aspergillosis in the compromised host. *Cancer* **1978**;41:2028–39.
133. Moro M, Galvin JR, Barloon TJ, Gingrich RD, Stanford W. Fungal pulmonary infections after bone marrow transplantation: evaluation with radiography and CT. *Radiology* **1991**;178:721–6.
134. Pasmans HLM, Loosveld OJL, Schouten HC, Thunnissen F, van Engelsehoven JAM. Invasive aspergillosis in immunocompromised patients: findings on plain film and (HR)CT. *Eur J Radiol* **1992**;14:37–40.
135. Sallustio G, Pagano L, La Barbera EO, et al. Pulmonary aspergillosis in patients with hematologic malignancies: clinicoradiologic correlation. *Rays* **1994**;19:465–78.
136. Staples CA, Kang EY, Wright JL, Phillips P, Müller NL. Invasive pulmonary aspergillosis in AIDS: radiographic, CT, and pathologic findings. *Radiology* **1995**;196:409–14.
137. Logan PM, Primack SL, Staples C, Miller RR, Müller NL. Acute lung disease in the immunocompromised host: diagnostic accuracy of the chest radiograph. *Chest* **1995**;108:1283–7.
138. Kuhlman JE, Fishman EK, Siegelman SS. Invasive pulmonary aspergillosis in acute leukemia: characteristic findings on CT, the CT halo sign, and the role of CT in early diagnosis. *Radiology* **1985**;157:611–4.
139. Blum U, Windfuhr M, Buitrago-Tellez C, Sigmund G, Herbst EW, Langer M. Invasive pulmonary aspergillosis. MRI, CT, and plain radiographic findings and their contribution for early diagnosis. *Chest* **1994**;106:1156–67.
140. Taccone A, Occhi M, Garaventa A, Manfredini, Viscoli C. CT of invasive pulmonary aspergillosis in children with cancer. *Pediatr Radiol* **1993**;23:177–80.
141. Midiri M, Lo Casto A, Cascio A, Scarlata F, De Maria M. Invasive pulmonary aspergillosis—CT findings. *Mediterranean Journal of Infectious and Parasitic Diseases* **1994**;9:59–62.
142. Primack SL, Hartman TE, Lee KS, Müller NL. Pulmonary nodules and the CT halo sign. *Radiology* **1994**;190:513–5.
143. Lortholary O, Meyohas MC, Dupont B, et al. Invasive aspergillosis in patients with acquired immunodeficiency syndrome: report of 33 cases. *Am J Med* **1993**;95:177–87.

144. Mouy R, Fischer A, Vilmer E, Seger R, Griscelli C. Incidence, severity, and prevention of infections in chronic granulomatous disease. *J Pediatr* **1989**;114:555–60.
145. Denning DW, Stevens DA. Antifungal and surgical treatment of invasive aspergillosis: review of 2,121 published cases. *Rev Infect Dis* **1990**;12:1147–201.
146. Binder RE, Faling LJ, Pugatch RD, Mahasaen C, Snider GL. Chronic necrotizing pulmonary aspergillosis: a discrete clinical entity. *Medicine (Baltimore)* **1982**;61:109–24.
147. Palmer LB, Greenberg HE, Schiff MJ. Corticosteroid treatment as a risk factor for invasive aspergillosis in patients with lung disease. *Thorax* **1991**;46:15–20.
148. Caras WE, Pluss JL. Chronic necrotizing pulmonary aspergillosis: pathologic outcome after itraconazole therapy. *Mayo Clin Proc* **1996**;71:25–30.
149. Geffer WB, Weingrad TR, Epstein DM, Ochs RH, Miller WT. “Semi-invasive” pulmonary aspergillosis: a new look at the spectrum of aspergillus infections of the lung. *Radiology* **1981**;140:313–21.
150. Karam GH, Griffin FM Jr. Invasive pulmonary aspergillosis in nonimmunocompromised, nonneutropenic hosts. *Rev Infect Dis* **1986**;8:357–63.
151. Karim M, Alam M, Shah AA, Ahmed R, Sheikh H. Chronic invasive aspergillosis in apparently immunocompetent hosts. *Clin Infect Dis* **1997**;24:723–33.
152. Yousem SA. The histological spectrum of chronic necrotizing forms of pulmonary aspergillosis. *Hum Pathol* **1997**;28:650–6.
153. Kemper CA, Hostetler JS, Follansbee SE, et al. Ulcerative and plaque-like tracheobronchitis due to infection with *Aspergillus* in patients with AIDS. *Clin Infect Dis* **1993**;17:344–52.
154. Kramer MR, Denning DW, Marshall SE, et al. Ulcerative tracheobronchitis following lung transplantation: a new form of invasive aspergillosis. *Am Rev Resp Dis* **1991**;144:552–6.
155. Kac G, Roux P, Poirot JL, et al. Aspergillosis: étude retrospective dans deux hopitaux parisiens. *J Mycol Med* **1995**;5:75–85.
156. Flume PA, Egan TM, Paradowski LJ, Detterbeck FC, Thompson T, Yankaskas R. Infectious complications of lung transplantation. Impact of cystic fibrosis. *Am J Respir Crit Care Med* **1994**;149:1601–7.
157. Tait RC, O’Driscoll BR, Denning DW. Unilateral wheeze due to pseudomembranous *Aspergillus* tracheobronchitis in the immunocompromised patient. *Thorax* **1993**;48:1285–7.
158. Logan PM, Primack SL, Miller RR, Müller NL. Invasive aspergillosis of the airways: radiographic, CT, and pathologic findings. *Radiology* **1994**;193:383–8.
159. Talbot GH, Huang A, Provencher M. Invasive aspergillus rhinosinusitis in patients with acute leukemia. *Rev Infect Dis* **1991**;13:219–32.
160. Voillier AF, Peterson DE, de Jongh CA, et al. *Aspergillus* sinusitis in cancer patients. *Cancer* **1986**;58:366–71.
161. Drakos PE, Nagler A, Or R, et al. Invasive fungal sinusitis in patients undergoing bone marrow transplantation. *Bone Marrow Transplant* **1993**;12:203–8.
162. Choi SS, Milmoie GJ, Dinndorf PA, Quinones RR. Invasive *Aspergillus* sinusitis in pediatric bone marrow transplant patients. Evaluation and management. *Arch Otolaryngol Head Neck Surg* **1995**;121:1188–92.
163. Iwen PC, Rupp ME, Hinrichs SH. Invasive mold sinusitis: 17 cases in immunocompromised patients and review of the literature. *Clin Infect Dis* **1997**;24:1178–84.
164. Jahrsdoerfer RA, Ejercito VS, Johns MME, Cantrell RW, Sydnor JB. Aspergillosis of the nose and paranasal sinuses. *Am J Otolaryngol* **1979**;1:6–14.
165. Stammberger H, Jakse R, Beaufort F. Aspergillosis of the paranasal sinuses: X-ray diagnosis, histopathology, and clinical aspects. *Ann Otol Rhinol Laryngol* **1984**;93:251–6.
166. Washburn RG, Kennedy DW, Begley MG, Henderson DK, Bennett JE. Chronic fungal sinusitis in apparently normal hosts. *Medicine (Baltimore)* **1988**;67:231–47.
167. de Carpentier J, Ramamurthy M, Taylor P, Denning DW. An algorithmic approach to *Aspergillus* sinusitis. *J Laryngol Otol* **1994**;108:314–8.
168. Milosev B, Davidson CM, Gentles JC, Sandison AT. *Aspergillus* of paranasal sinuses and orbit in northern Sudanese. *Lancet* **1966**;1:746–7.
169. Gumaa SA, Mahgoub ES, Hay RJ. Post-operative responses of paranasal *Aspergillus* granuloma to itraconazole. *Trans R Soc Trop Med Hyg* **1992**;86:93–4.
170. Shubert MM, Peterson DE, Meyers JD, Hackman R, Thomas ED. Head and neck aspergillosis in patients undergoing bone marrow transplantation. Report of four cases and review of the literature. *Cancer* **1986**;57:1092–6.
171. Chambers MS, Lyzak WA, Martin JW, Lyzak JS, Toth BB. Oral complications associated with Aspergillosis in patients with hematologic malignancy. Presentation and treatment. *Oral Surg Oral Med Oral Pathol Oral Radiol Endod* **1995**;79:559–63.
172. Kennedy CA, Adams GL, Neglia JP, Giebink GS. Impact of surgical treatment on paranasal fungal infections in bone marrow transplant patients. *Otolaryngol Head Neck Surg* **1997**;116:610–6.
173. Meyer RD, Gaultier CR, Yamashita JT, Babapour R, Pitchon HE, Wolfe PR. Fungal sinusitis in patients with AIDS: report of 4 cases and review of the literature. *Medicine (Baltimore)* **1994**;73:69–78.
174. Zinreich SJ, Kennedy DW, Malat J, et al. Fungal sinusitis: diagnosis with CT and MR imaging. *Radiology* **1988**;169:439–44.
175. Miglets AW, Saunders WH, Ayers L. Aspergillosis of the sphenoid sinus. *Arch Otolaryngol* **1978**;104:47–50.
176. Lew D, Southwick FS, Montgomery WW, Weber AL, Baker AS. Sphenoid sinusitis. A review of 30 cases. *N Engl J Med* **1983**;309:1149–54.
177. Lavelle WG. Aspergillosis of the sphenoid sinus. *Ear Nose Throat J* **1988**;67:266–9.
178. Lin WS, Hung HY. Transnasal endoscopic surgery of sphenoid sinus aspergillosis. *J Laryngol Otol* **1993**;107:837–9.
179. Swift AC, Denning DW. Skull base osteomyelitis following fungal sinusitis. *J Otolaryngol* **1998** (in press).
180. Hutter VP, Lieberman PH, Collins HS. Aspergillosis in a cancer hospital. *Cancer* **1964**;17:747–66.
181. Gurwith MJ, Stinson EB, Remington JS. *Aspergillus* infection complicating cardiac transplantation: report of five cases. *Arch Intern Med* **1971**;128:541–5.
182. Peterson PK, McGlave P, Ramsay NKC, et al. A prospective study of infectious diseases following bone marrow transplantation: emergence of *Aspergillus* and cytomegalovirus as the major causes of mortality. *Infect Control* **1983**;4:81–9.
183. Rotstein C, Cummings M, Tidings J, et al. An outbreak of invasive aspergillosis among allogeneic bone marrow transplants: a case-control study. *Infect Control* **1985**;6:347–55.
184. Kusne SJ, Dummer JS, Singh N, et al. Infections after liver transplantation: an analysis of 101 consecutive cases. *Medicine (Baltimore)* **1988**;67:132–43.
185. Wilkes MS, Fortin AH, Felix JC, Godwin TA, Thompson WG. Value of necropsy in acquired immunodeficiency syndrome. *Lancet* **1988**;2:85–8.
186. Bodey G, Bueltmann B, Duguid W, et al. Fungal infections in cancer patients: an international autopsy survey. *Eur J Clin Microbiol Infect Dis* **1992**;11:99–109.
187. Verweij PE, Donnelly JP, Kullberg BJ, Meis JFGM, De Pauw BE. Amphotericin B versus amphotericin B plus 5-flucytosine: poor results in the treatment of proven systemic mycoses in neutropenic patients. *Infection* **1994**;22:81–5.
188. Chandrasekar PH, Weinmann A, Shearer C. Autopsy-identified infections among bone marrow transplant recipients: a clinico-pathologic study of 56 patients. *Bone Marrow Transplant* **1995**;16:675–81.
189. Allo M, Miller J, Townsend T, Tan C. Primary cutaneous aspergillosis associated with Hickman intravenous catheters. *N Engl J Med* **1987**;317:1105–8.

190. Khardori N, Hayat S, Rolston K, Bodey GP. Cutaneous *Rhizopus* and *Aspergillus* infections in five patients with cancer. *Arch Dermatol* **1989**;125:952–6.
191. Grossman ME, Ellen MD, Fithian C, et al. Primary cutaneous aspergillosis in six leukemic children. *J Am Acad Dermatol* **1985**;12:313–8.
192. Walmsley S, Devi S, King S, Schneider R, Richardson S, Ford-Jones L. Invasive *Aspergillus* infections in a pediatric hospital: a ten-year review. *Pediatr Infect Dis J* **1993**;12:673–82.
193. Stiller MJ, Teperman L, Rosenthal SA, et al. Primary cutaneous infection by *Aspergillus ustus* in a 62-year-old liver transplant recipient. *J Am Acad Dermatol* **1994**;31:344–7.
194. Papouli M, Roilides E, Bibashi E, Andreou A. Primary cutaneous aspergillosis in neonates: case report and review. *Clin Infect Dis* **1996**;22:1102–4.
195. Larkin JA, Greene JN, Sandin RL, Houston SH. Primary cutaneous aspergillosis: case report and review of the literature. *Infect Control Hosp Epidemiol* **1996**;17:365–6.
196. Rowen JL, Atkins JT, Levy ML, Baer SC, Baker CJ. Invasive fungal dermatitis in the <1000-gram neonate. *Pediatrics* **1995**;95:682–7.
197. Shetty D, Giri N, Gonzalez CE, Pizzo PA. Invasive aspergillosis in human immunodeficiency virus-infected children. *Pediatr Infect Dis J* **1997**;16:216–21.
198. Bruck HM, Nash G, Foley FD, Pruitt BA Jr. Opportunistic fungal infection of the burn wound with phycomycetes and *Aspergillus*. *Arch Surg* **1971**;102:476–82.
199. Stone HH, Cuzzell JZ, Kolb LD, Moskowitz MS, McGowan JE Jr. *Aspergillus* infection of the burn wound. *J Trauma* **1979**;19:765–7.
200. Becker WK, Cioffi WG Jr, McManus AT, et al. Fungal burn wound infection. A 10-year experience. *Arch Surg* **1991**;126:44–8.
201. Pla MP, Berenguer J, Arzuaga JA, Banares R, Polo JR, Bouza E. Surgical wound infection by *Aspergillus fumigatus* in liver transplant recipients. *Diagn Microbiol Infect Dis* **1992**;15:703–6.
202. Shapiro K, Tabaddor K. Cerebral aspergillosis. *Surg Neurol* **1975**;4:465–71.
203. Britt RH, Enzmann DR, Remington JS. Intracranial infection in cardiac transplant recipients. *Ann Neurol* **1981**;9:107–19.
204. Beal MF, O'Carroll CP, Kleinman GM, Grossman RI. Aspergillosis of the nervous system. *Neurology* **1982**;32:473–9.
205. Walsh TJ, Hier DB, Caplan LR. Aspergillosis of the central nervous system: clinicopathological analysis of 17 patients. *Ann Neurol* **1985**;18:574–82.
206. Boon AP, Adams DH, Buckels J, McMaster P. Cerebral aspergillosis in liver transplantation. *J Clin Pathol* **1990**;43:114–8.
207. Mori T, Ebe T. Analysis of cases of central nervous system fungal infections reported in Japan between January 1979 and June 1989. *Intern Med* **1992**;31:174–9.
208. Haran RP, Chandy MJ. Intracranial *Aspergillus* granuloma. *Br J Neurosurg* **1993**;7:383–8.
209. Torre-Cisneros J, Lopez OL, Kusne S, et al. CNS aspergillosis in organ transplantation: a clinicopathological study. *J Neurol Neurosurg Psychiatry* **1993**;56:188–93.
210. Martinez AJ, Ahdab-Barmada M. The neuropathology of liver transplantation: comparison of main complications in children and adults. *Mod Pathol* **1993**;6:25–32.
211. Darras-Joly C, Vever B, Bedos JP, Gachot B, Regnier B, Wolfe M. Nosocomial cerebral aspergillosis: a report of 3 cases. *Scand J Infect Dis* **1996**;28:317–9.
212. Boes B, Bashir R, Boes C, Hahn F, McConnell JR, McComb R. Central nervous system aspergillosis. *J Neuroimaging* **1994**;4:123–9.
213. Hagensee ME, Bauwens JE, Kjos B, Bowden RA. Brain abscess following marrow transplantation: experience at the Fred Hutchinson Cancer Research Center, 1984–1992. *Clin Infect Dis* **1994**;19:402–8.
214. Sanchez C, Mauri E, Dalmau D, Quintana S, Aparicio A, Garau J. Treatment of cerebral aspergillosis with itraconazole: Do high doses improve the prognosis? *Clin Infect Dis* **1995**;21:1485–7.
215. Selby R, Ramirez CB, Singh R, et al. Brain abscess in solid organ transplant recipients receiving cyclosporine-based immunosuppression. *Arch Surg* **1997**;132:304–10.
216. Sharma BS, Khosla VK, Kak VK, et al. Intracranial fungal granuloma. *Surg Neurol* **1997**;47:489–97.
217. Yuh WTC, Nguyen HD, Gao F, et al. Brain parenchymal infection in bone marrow transplantation patients: CT and MR findings. *AJR Am J Roentgenol* **1994**;162:425–30.
218. Ashdown BC, Tien RD, Felsberg GJ. Aspergillosis of the brain and paranasal sinuses in immunocompromised patients: CT and MR imaging findings. *AJR Am J Roentgenol* **1994**;162:155–9.
219. Miaux Y, Ribaud P, Williams M, et al. MR of cerebral aspergillosis in patients who have had bone marrow transplantation. *Am J Neuroradiol* **1995**;16:555–62.
220. Bodey GP, Vartivarian S. Aspergillosis. *Eur J Clin Microbiol Infect Dis* **1989**;8:413–37.
221. Levy H, Horak DA, Tegtmeier BR, Yokota SB, Forman SJ. The value of bronchoalveolar lavage and bronchial washings in the diagnosis of invasive pulmonary aspergillosis. *Respir Med* **1992**;86:243–8.
222. Kahn FW, Jones JM, England DM. The role of bronchoalveolar lavage in the diagnosis of invasive pulmonary aspergillosis. *Am J Clin Pathol* **1986**;86:518–23.
223. Fischler DF, Hall GS, Gordon S, Stoler MH, Nunez C. *Aspergillus* in cytology specimens: a review of 45 specimens from 36 patients. *Diagn Cytopathol* **1997**;16:26–30.
224. Kwok-Yung Y, Woo CY, Ip MSM, et al. Stage-specific manifestations of mold infections in bone marrow transplant recipients: risk factors and clinical significance of positive concentrated smears. *Clin Infect Dis* **1997**;25:37–42.
225. Jenssen HE, Salonen J, Ekfors TO. The use of immunohistochemistry to improve sensitivity and specificity in the diagnosis of systemic mycoses in patients with haematological malignancies. *J Pathol* **1997**;181:100–5.
226. Dupont B, Improvisi I, Provost F. Detection de galactommane dans les aspergilloses invasives humaines et animales avec un test au latex. *Bulletin de Societe Francais de Mycologie Medicale* **1990**;19:35–42.
227. Verweij PE, Denning DW. Diagnostic and therapeutic strategies for invasive aspergillosis. *Seminars in Respiratory and Critical Care Medicine*. **1997**;18:203–15.
228. Obayashi T, Yoshida M, Mori T, et al. Plasma (1,3)- $\beta$ -D-glucan measurement in diagnosis of invasive deep mycosis and fungal febrile episodes. *Lancet* **1995**;345:17–20.
229. Yuasa K, Goto H, Iguchi M, Okamura T, Ieki R. Evaluation of the diagnostic value of the measurement of (1,3)- $\beta$ -D-glucan in patients with pulmonary aspergillosis. *Respiration* **1996**;63:78–83.
230. Tomee JF, Mannes GP, van der Bij W, et al. Serodiagnosis and monitoring of aspergillus infections after lung transplantation. *Ann Intern Med* **1996**;125:197–201.
231. Einsle H, Hebart H, Roller G, et al. Detection and identification of fungal pathogens in blood by using molecular probes. *J Clin Microbiol* **1997**;135:53–60.
232. Tang CM, Holden DW, Aufauvre-Brown A, Cohen J. The detection of *Aspergillus* spp. by the polymerase chain reaction and its evaluation in bronchoalveolar lavage fluid. *Am Rev Respir Dis* **1993**;148:1313–7.
233. Bretagne S, Costa JM, Marmorat-Khuong A, et al. Detection of *Aspergillus* species DNA in bronchoalveolar lavage samples by competitive PCR. *J Clin Microbiol* **1995**;116:4–8.
234. Bart-Delabesse E, Marmorat-Khuong A, Costa JM, Dubreuil-Lemaire ML, Bretagne S. Detection of *Aspergillus* DNA in bronchoalveolar lavage fluid of AIDS patients by the polymerase chain reaction [letter]. *Eur J Clin Microbiol Infect Dis* **1996**;15:24–5.
235. Denning DW, Lee JY, Hostetler JS, et al. NIAID Mycoses Study Group multicenter trial of oral itraconazole therapy of invasive aspergillosis. *Am J Med* **1994**;97:135–44.

236. Sanchez C, Mauri E, Dalmau D, Quintana S, Aparicio A, Garau J. Treatment of cerebral aspergillosis with itraconazole: do high doses improve the prognosis? *Clin Infect Dis* **1995**;21:1485–7.
237. Meunier F, Prentice HG, Ringden O. Liposomal amphotericin B (Ambisome) safety data from a phase II/III clinical trial. *J Antimicrob Chemother* **1991**;28(suppl B):S83–91.
238. Mills W, Chopra R, Linch DC, et al. Liposomal amphotericin B in the treatment of fungal infections in neutropenic patients: a single-centre experience of 133 episodes in 116 patients. *Br J Haematol* **1994**;86:754–60.
239. Oppenheim BA, Herbrecht R, Kusne S. The safety and efficacy of amphotericin B colloidal dispersion in the treatment of invasive mycoses. *Clin Infect Dis* **1995**;21:1145–53.
240. Hiemenz JW, Walsh TJ. Lipid formulations of amphotericin B: recent progress and future directions. *Clin Infect Dis* **1996**;22(suppl 2):S133–44.
241. White MH, Anaissie EJ, Kusne S, et al. Amphotericin B colloidal dispersion vs. amphotericin B as therapy for invasive aspergillosis. *Clin Infect Dis* **1997**;24:635–42.
242. Mehta J, Kelsey S, Chu P, et al. Amphotericin B lipid complex (ABLC) for the treatment of confirmed or presumed fungal infections in immunocompromised patients with hematologic malignancies. *Bone Marrow Transplant* **1997**;20:39–43.
243. Walsh TJ, Hiemenz JW, Seibel N, et al. Amphotericin B lipid complex in patients with invasive fungal infections: analysis of safety and efficacy in 556 cases [abstract F571]. In: Program and abstracts of the 37th Interscience Conference on Antimicrobial Agents and Chemotherapy (Toronto). Washington, DC: American Society for Microbiology, **1997**.
244. Ellis M, Spence D, Meunier F, et al. Randomised multicentre trial of 1 mg/kg (LD) versus 4 mg/kg (HD) liposomal amphotericin B (AmBisome) (LAB) in the treatment of invasive aspergillosis (IA) [abstract LM39]. In: Program and abstracts of the Interscience Conference on Antimicrobial Agents and Chemotherapy (New Orleans). Washington, DC: American Society for Microbiology, **1996**.
245. Karp JE, Burch PA, Merz WG. An approach to intensive antileukemia therapy in patients with previous invasive aspergillosis. *Am J Med* **1998**;85:203–6.
246. Martino R, Nomdedéu JA, Sureda A, Brunet S, Martínez C, Domingo-Albós A. Successful bone marrow transplantation in patients with previous invasive fungal infections: report of four cases. *Bone Marrow Transplant* **1994**;13:265–9.
247. Hoover M, Morgan ER, Kletzel M. Prior fungal infection is not a contraindication to bone marrow transplant in patients with acute leukemia. *Med Pediatr Oncol* **1997**;28:268–73.
248. Krüger W, Stockschröder M, Sobotta I, et al. Antimycotic therapy with liposomal amphotericin B for patients undergoing bone marrow or peripheral blood stem cell transplantation. *Leuk Lymphoma* **1997**;24:491–9.
249. Martino R, Lopez R, Sureda A, Brunet S, Domingo-Albós A. Risk of reactivation of a recent invasive fungal infection in patients with hematological malignancies undergoing further intensive chemo-radiotherapy. A single-center experience and review of the literature. *Haematologica* **1997**;82:297–304.
250. Böhme A, Ganser A, Hoelzer D. Aggravation of vincristine-induced neurotoxicity by itraconazole in the treatment of adult ALL. *Ann Hematol* **1995**;71:311–2.
251. Denning DW, del Favero A, Gluckman E, et al. The efficacy and tolerability of UK 109, 496 (Voriconazole) in the treatment of invasive aspergillosis (IA) [abstract F552]. In: Proceedings of the 13th Congress of the International Society for Human and Animal Mycology. Parma, Italy: International Society for Human and Animal Mycology, **1997**.
252. Denning DW, Radford SA, Oakley KL, Hall L, Johnson EM, Warnock DW. Correlation between in-vitro susceptibility testing to itraconazole and in-vivo outcome of *Aspergillus fumigatus* infection. *J Antimicrob Chemother* **1997**;40:401–14.
253. Denning DW, Venkateswarlu K, Oakley KL, et al. Itraconazole resistance in *Aspergillus fumigatus*. *Antimicrob Agents Chemother* **1997**;41:1364–8.
254. Verweij PE, Oakley KL, Morrissey J, Morrissey G, Denning DW. Efficacy of LY303,366 against amphotericin B “Susceptible” and “Resistant” *A. fumigatus* infection in an immunocompromised murine model [abstract F73]. In: Program and abstracts of the Interscience Conference on Antimicrobial Agents and Chemotherapy (Toronto). Washington, DC: American Society for Microbiology, **1997**.
255. Robinson LA, Reed EC, Galbraith TA, Alonso A, Moulton AL, Fleming WH. Pulmonary resection for invasive *Aspergillus* infections in immunocompromised patients. *J Thorac Cardiovasc Surg* **1995**;109:1182–97.
256. Nemunaitis J, Shannon-Dorcy K, Appelbaum FR, et al. Long-term follow-up of patients with invasive fungal disease who received adjunctive therapy with recombinant human macrophage colony-stimulating factor. *Blood* **1993**;82:1422–7.
257. Ribrag V, Drevtus F, Venot A, Leblong V, Lanore J, Varet B. Prognostic factors of invasive pulmonary aspergillosis in leukemic patients. *Leuk Lymphoma* **1993**;10:317–21.

The “Conflict-of-Interest Policy” of the Office of Continuing Medical Education, UCLA School of Medicine, requires that faculty participating in a CME activity disclose to the audience any relationship with a pharmaceutical or equipment company which might pose a potential, apparent, or real conflict of interest with regard to their contribution to the program. The author reports no conflict of interest.
